# Supplementary material
Source: Research Square preprint supplement (doi:10.21203/rs.3.rs-9331155/v1)

### Severe Alcohol associated Hepatitis (sAH)

**↑ Inflammation**

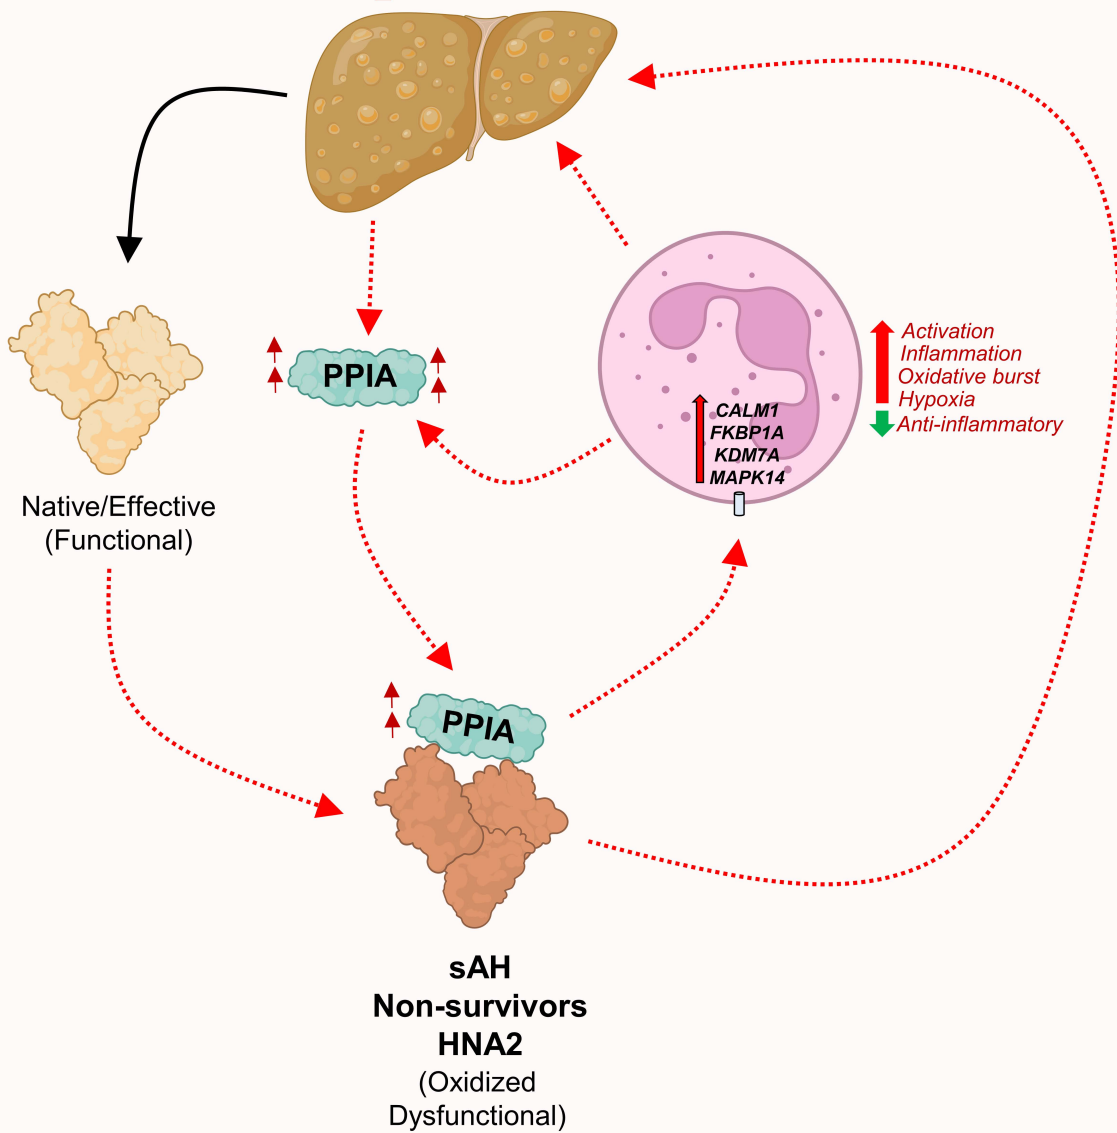

### Severe Alcohol associated Hepatitis (sAH)

**↑ Inflammation**

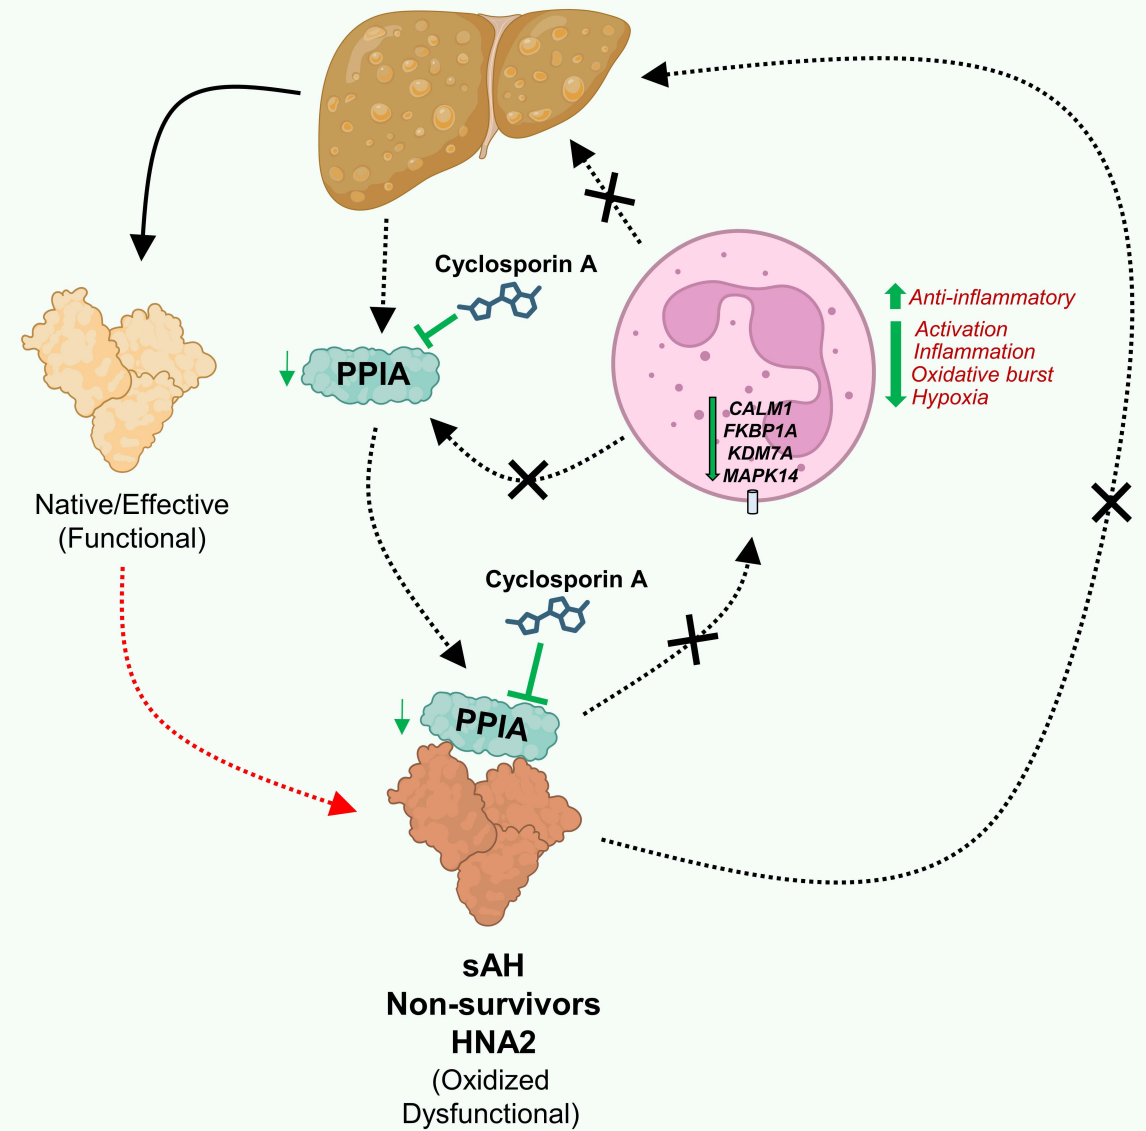

Supplement: Supplementary file 1 [file 2be621c1c35e425710a9f444.pdf]
