# Supplementary material
Source: Research Square preprint supplement (doi:10.21203/rs.3.rs-9331155/v1)
Supplement: Supplementary file 2 [file 3b430de3c7fa2eeedb5c01d4.docx]

**Supplementary Table 1: Clinical and immunological profile of Healthy, Decompensated Cirrhosis and SAH**

|  | Healthy | Survival SAH | Non-survival SAH | Decompensated Cirrhosis |  |
| --- | --- | --- | --- | --- | --- |
| No. of Individual | N=15 | n=30 | n=30 | n=50 | p-value |
| Sex | Female=08; Male=12 | Female=01; Male=74 | Female=01; Male=24 | Female=00; Male=11 |  |
| Age | 25 (21-50) | 41.5(21-65) | 41(25-66) | 42(30-48) | 0.84 |
| MELD-NA | NA | 28(6-43) | 38(26-49) | (21-32)28 | 0 |
| CTP | NA | 10(5-14) | 10(7-13) | 10(9-13) | 0.56 |
| DF score | NA | 206.35(56.81-615.02) | 234.03(117.99-409.4) | 117(40-165) | 0.094065162 |
| ABIC SCORE | NA | 7.80(3.81-10.80) | 8.6(5.96-11.27) | 6.09(3.98-10.58) | 0.01215391 |
| APRI | NA | 3.93(0.03-23.23) | 5.21(1.16-21.87) | 4.09(0.045-21.09) | 0.149430131 |
| FIB-4 | NA | 7.1(0.0074-41.31) | 9.5(1.51-37.64) | 8.9(0.95-17) | 0.099078217 |
| AAR | NA | 2.88(0.46-7.72) | 3.4(0.7-11.64) | 3.5(0.76-10.76) | 0.179277389 |
| ALBI SCORE | NA | 0.65(0.16-2.04) | 0.68(0.33-0.877) | 0.86(0.788-1.08) | 0.529755437 |
| PALBI SCORE | NA | 1.5(0.052-2.12) | 1.68(0.87-2.03) | 1.6(0.98-2.09) | 0.171898871 |
| Total Protein (G/DL) | 7.34(6.79-8.21) | 6.7(5.3-8.6) | 6.1(5.2-7.8) | 7.2(6.4-8.3) | 0.31 |
| Albumin (G/DL) | 4.32(4.2-5.25) | 2.25(1.4-3.6) | 2.25(1.4-3.3) | 2.3(1.7-3.2) | 0.47 |
| Bilirubin (mg/dl) | 0.61 (0.5-1.1) | 18.7(0.65-46.8) | 25.8(4.9-39.8) | 18.4(3.3-32.6) | 0.17 |
| INR | 0.78(0.54-0.8) | 2.04(0.93-5.52) | 2.59(1.3-5.74) | 1.95(1.59-3.12) | 0.00852212 |
| Creatinine (mg/dl) | 1.132(0.93-1.23) | 0.61(0.09-3.59) | 1.13(0.2-4.61) | 0.44(0.18-1.08) | 0.02151651 |
| Na (mmol/L) | 131(134-145) | 131(41-148) | 132(3.5-143) | 131.65(126-136) | 0.07539193 |
| PT | 7.5(6.76-8.21) | 21.9(3.3-125) | 26.9(14.7-54.7) | 20.8(18.2-31.2) | 0.28826278 |
|  |  |  |  |  |  |
| Alkaline phosphatase | 48(46-102) | 106(31-220) | 120(34-310) | 118(70-161) | 0.128774 |
| AST (IU/L) | 23.5(21-32) | 131(21-396) | 138(54-403) | 116(75-209) | 0.66792811 |
| ALT (IU/L) | 31(30.7-32.5) | 47(16-342) | 39(14-173) | 53(27-100) | 0.83212827 |
| GGT (IU/L) | 40(34-46.8) | 88.5(17-715) | 116.5(10-998) | 86(27-198) | 0.01339162 |
| HB (g/dl) | 16(15-18.5) | 10.1(6.2-13.8) | 10(7-12.5) | 10.1(8.4-12) | 0.78244177 |
| Platelet/L | 302(236-353) | 124(39-7400) | 109(29-310) | 154(69-289) | 0.56138196 |
| Neutrophils | 65(47.5-71) | 73.6(41-88) | 72(70-79) | 74.5(70-85) | 0.8386638 |
| Lymphocytes | 3(2.25-4) | 12.95(6-47) | 11.6(8-18) | 15.5(11-18) | 0.9765 |
| TLC | 7.9(1.4-20.0) | 11.1(3.5-15800) | 15.9(4-46.9) | 12.6(5.3-23.2) | 0.57014113 |
| Urea (mg/dl) | 6(4.4-15.6) | 23.6(6-145.5) | 61.35(13.4-329.5) | 19.26(14-39.5) | 0.00017463 |
| Potassium (mmol/L) | 3.2(3.3-4.1) | 3.95(2.5-30) | 3.7(2.5-5.7) | 3.95(3.3-5.2) | 0.49016936 |
| Chloride (mmol/L) | 98(95-99) | 101(86.7-117) | 99.9(83-106) | 97.1(90-110.2) | 0.4760141 |
|  |  | Survival SAH |  | Non-survival SAH |  |
| AKI |  | 13% |  | 44% |  |
| SEPSIS |  | 2.60% |  | 28% |  |
| MOF |  | 9.30% |  | 44% |  |
| JAUNDICE |  | 97% |  | 48% |  |
| HEPATIC FAILURE |  | 16% |  | 100% |  |
| HE-I |  | 29.33% |  | 20% |  |
| HE-II |  | 1.33% |  | 20% |  |
| HE-III |  | 3% |  | 12% |  |
| HE-IV |  | 2% |  | 8% |  |
| ACSITES |  | 76% |  | 72% |  |

**Supplementary Tabe 2: Lipids bound to SAH Non-survivors HMA**

|  | Pval | FC |
| --- | --- | --- |
| 3-O-alpha-L-rhamnopyranosyl-3-hydroxydecanoyl-3-hydroxydecanoic acid | 1.13E-17 | 5.7095 |
| 3-O-alpha-L-rhamnopyranosyl-3-hydroxyundecanoyl-3-hydroxydecanoic acid | 1.72E-16 | 5.1578 |
| 3-O-alpha-L-rhamnopyranosyl-3-hydroxydodecanoyl-3-hydroxydecanoic acid | 7.16E-10 | 4.1648 |
| PA(O-16:0/13:0) | 1.62E-10 | 4.0808 |
| PC(20:3(8Z,11Z,14Z)/0:0) | 2.20E-13 | 3.7052 |
| PC(36:4(21Z,24Z,27Z,30Z)/20:4(5Z,8Z,11Z,14Z)) | 2.59E-12 | 3.6258 |
| PG(O-16:0/14:1(9Z)) | 3.64E-15 | 3.5004 |
| 2-Dehydro-3-deoxylaetiporic acid A | 1.75E-10 | 3.3495 |
| Estriol3-sulfate16-glucuronide | 7.24E-11 | 3.3324 |
| (7Z)-14-hydroxy-10,13-dioxoheptadec-7-enoic acid | 3.54E-11 | 3.2782 |
| N-pentacosanoyl taurine | 1.76E-11 | 3.2116 |
| n-decanohydroxamic acid | 8.27E-09 | 3.1493 |
| all-trans-7-hydroxyhexadeca-2,4,8,10-tetraenoic acid | 4.19E-10 | 3.0373 |
| 16,17-epoxy-DHA | 4.53E-07 | 2.9386 |
| PG(O-16:0/15:1(9Z)) | 1.32E-11 | 2.8886 |
| Leukotriene E3 | 1.79E-07 | 2.8414 |
| 12-amino-dodecanoic acid | 1.05E-06 | 2.8402 |
| [SThydroxy(3:0)]5alpha-pregnan-17alpha 21-dihydroxy-3 11 20-trione | 2.17E-09 | 2.7728 |
| PG(19:0/0:0) | 2.75E-10 | 2.7517 |
| PI(16:1(9Z)/0:0) | 1.45E-08 | 2.722 |
| Dokdolipid C | 4.96E-07 | 2.4993 |
| PG(13:0/18:4(6Z,9Z,12Z,15Z)) | 7.77E-10 | 2.4728 |
| 7-hydroxy-10E,16-heptadecadien-8-ynoic acid | 2.58E-08 | 2.4692 |
| PA(O-20:0/17:2(9Z,12Z)) | 3.81E-10 | 2.4577 |
| PG(12:0/19:0) | 1.75E-10 | 2.4338 |
| PA(19:3(10Z,13Z,16Z)/0:0) | 6.49E-09 | 2.3483 |
| PC(0:0/PGE2) | 2.57E-05 | 2.2695 |
| PG(20:5(5Z,8Z,11Z,14Z,17Z)/0:0) | 0.00015 | 2.2493 |
| 2E 6E-farnesol | 1.05E-07 | 2.2342 |
| [STtrihydrox]3alpha 11beta 21-5alpha-trihydroxy-pregnane-20-one | 7.57E-05 | 2.1938 |
| PI(16:0/0:0) | 7.78E-08 | 2.1449 |
| methyl 9-hydroperoxy-10,12,13,15-bisepidioxy-16E-octadecenoate | 2.24E-08 | 2.1348 |
| PGP(16:0/18:1(9Z)) | 3.02E-07 | 2.0829 |
| 6Z,9Z,12Z,15Z,18Z-tetracosapentaenoic acid | 1.23E-05 | 2.0702 |
| (2E 6E)-(10R 11S)-10 11-Epoxy-3 7 11-trimethyltrideca-2 6-dienoicacid | 8.75E-08 | 2.0653 |
| PS(P-18:0/22:6(4Z,7Z,10Z,13Z,16Z,19Z)) | 1.42E-05 | 2.0589 |
| PA(18:0/0:0) | 9.03E-07 | 1.9979 |
| Palmitoleicacid | 1.32E-05 | 1.9485 |
| 9-Oxononanoicacid | 5.72E-11 | 1.9425 |
| PS(12:0/17:0) | 7.31E-06 | 1.9109 |
| 15R-PGE2 methyl ester, 15-acetate | 2.82E-06 | 1.8631 |
| PIM2(19:1(9Z)/18:1(9Z)) | 2.87E-06 | 1.8462 |
| OHOHA-PG | 1.80E-06 | 1.8416 |
| GS 1500 | 1.14E-05 | 1.8138 |
| PC(6:0/6:0) | 9.69E-08 | 1.7655 |
| PI(22:0/12:0) | 9.75E-06 | 1.7619 |
| 16-alpha-Hydroxypregnenolone | 0.002263 | 1.7428 |
| 2-Methylbutanal | 7.51E-06 | 1.7291 |
| PIM2(19:0/18:0) | 1.15E-06 | 1.7159 |

**Supplementary Tabe 3: Bacterial peptides bound to SAH Non-survivors HMA**

| Bacteria | Sequence | Pval | FC |
| --- | --- | --- | --- |
| Ehrlichia chaffeensis | KPVIPGDTLILTVNVVHK | 1.31E-21 | 10.973 |
| Azotobacter vinelandii | LAENGVR | 1.50E-21 | 8.9731 |
| Shewanella oneidensis | GVSPMCGNSVGQDRR | 1.37E-21 | 8.8669 |
| Protochlamydia amoebophila | LPHCSCK | 1.49E-21 | 8.4118 |
| Staphylococcus aureus | YGIEGDLYK | 1.39E-21 | 8.2535 |
| Vesicomyosocius okutanii | TNTGTTSMFGYQMR | 1.39E-21 | 8.1732 |
| Bacillus subtilis | DEEAIGK | 1.51E-21 | 8.0635 |
| Paenarthrobacter nicotinovorans | CQEAENILIDSTLSSHDIAAAAHAAVQGLDPVPTVHGSAQYR | 1.54E-21 | 7.9907 |
| Mycoplasma capripneumoniae | ELWPSEDLVNQSK | 1.58E-21 | 7.6828 |
| Streptomyces viridosporus | SRIPDYAK | 2.12E-21 | 7.5792 |
| Chlamydia trachomatis D | AIRTLLVSVASR | 1.40E-21 | 7.433 |
| Rubrobacter xylanophilus | HAVITSVNR | 1.45E-21 | 7.4055 |
| Xanthomonas axonopodis | DGADPVK | 1.62E-21 | 7.3683 |
| Streptomyces netropsis | AVDGDFK | 2.65E-20 | 7.0596 |
| Streptococcus pneumoniae | EYYLDLR | 2.20E-21 | 6.9895 |
| Streptomyces ribosidificus | HGISVPR | 1.68E-21 | 6.8804 |
| Aliivibrio salmonicida | SMDEGNFEYK | 1.31E-20 | 6.8793 |
| Legionella pneumophila | YDTGEIGQAGTEVLCYGTAVII | 1.85E-18 | 6.8041 |
| Bacteroides fragilis | FLGNIEAKADAK | 1.45E-21 | 6.721 |
| Acidothermus cellulolyticus | LRPGPVMVEDKK | 8.50E-19 | 6.7122 |
| Corynebacterium aurimucosum | AIDSETDNR | 2.67E-19 | 6.683 |
| Pediococcus pentosaceus | LGEERGR | 6.08E-18 | 6.5971 |
| Synechococcus sp. | LGTVTFVESSGGGGFFSGLTAALGGAGAVRIPSGFRPINVAR | 1.59E-21 | 6.5041 |
| Bifidobacterium longum infantis | QHRPVRSGMSK | 3.20E-17 | 6.2786 |
| Streptomyces antibioticus | KALVLAGGSGTR | 5.67E-16 | 6.2757 |
| Cytophaga hutchinsonii | FVDEGQLRLQLEAK | 1.51E-17 | 6.261 |
| Bifidobacterium longum longum | LTSTLSLK | 1.21E-16 | 6.2547 |
| Pseudomonas putida | MASCAAR | 5.06E-21 | 6.1721 |
| Escherichia coli | RIPVTLDQIPPEMVK | 1.40E-15 | 6.1443 |
| Mycolicibacterium smegmatis | ESAQIAMSYVR | 6.14E-21 | 6.1434 |
| Escherichia coli O78:H11 | VLESLTK | 7.88E-15 | 6.0009 |
| Escherichia coli O17:K52:H18 | MLPSQSPAIFTVSR | 5.81E-17 | 5.9578 |
| Methylobacillus glycogenes | NECCAGQGR | 8.27E-17 | 5.951 |
| Bacillus subtilis natto | TFSWTHGDQKGTNQFTYNK | 2.43E-18 | 5.9024 |
| Lactobacillus leichmannii | FDFYEGAVY | 5.40E-18 | 5.7867 |
| Prochlorococcus marinus | QQLPVEIPVK | 4.57E-21 | 5.766 |
| Thermotoga petrophila | MFGEGAKVR | 1.38E-14 | 5.7168 |
| Mycoplasmopsis synoviae | EEGYISSYSVEGSK | 4.61E-21 | 5.69 |
| Listeria welshimeri 6b | LFGPAKAILK | 1.17E-13 | 5.6182 |
| Sulfurihydrogenibium sp. | FVSVFDGFEDIK | 3.19E-21 | 5.5168 |
| Neisseria meningitidis A | DPSAFFR | 2.43E-21 | 5.4877 |
| Mycoplasma sp | LMEIKSYR | 2.34E-21 | 5.4071 |
| Escherichia coli O157:H7 | WPSIGRAGFCYDAEIR | 1.06E-18 | 5.2354 |
| Staphylococcus aureus | NDQYWGEK | 3.33E-13 | 5.2085 |
| Streptococcus pneumoniae | DQEFIEAADK | 4.24E-17 | 5.1877 |
| Staphylococcus aureus | GVLVKGGVYLEK | 1.89E-20 | 5.0652 |
| Bordetella avium | FDQRGTLECGR | 2.99E-13 | 4.9835 |
| Streptomyces niveus | FCSDTTVLK | 3.67E-12 | 4.959 |
| Leptospira biflexa Patoc | HIGDILQRIEK | 1.50E-18 | 4.9396 |
| Equus caballus | AIADNEADAVTLDAGLVFEAGLSPYNLKPVVAEFYGSK | 2.65E-15 | 4.8905 |
| Streptococcus mutans c | FAGDTIAEANMGK | 1.36E-19 | 4.8519 |
| Haemophilus influenzae | HTEKAAK | 1.43E-19 | 4.8185 |
| Bifidobacterium animalis lactis | ADAEEQSSNEKFEIK | 1.14E-14 | 4.7417 |
| Neisseria gonorrhoeae | RPMSGNNVSHANNKTK | 1.77E-18 | 4.7279 |
| Chlorocebus aethiops | TGYYFDGISR | 4.42E-15 | 4.7195 |
| Shewanella sp. | IHPGIVVELLPMSTK | 1.62E-14 | 4.5944 |
| Methylobacterium sp. | LPDAADK | 3.48E-11 | 4.5826 |
| Mycobacterium tuberculosis | HLLRTGVVR | 3.78E-12 | 4.5149 |
| Synechocystis sp. | VYEQLTAEAK | 7.49E-18 | 4.5087 |
| Aeromonas hydrophila hydrophila | SALEDEQRQAEAEETAR | 9.17E-15 | 4.5082 |
| Maridesulfovibrio salexigens | CFTDKCSYER | 6.30E-18 | 4.487 |
| Mycobacterium sp. | EQTILVFDLGGGTFDVSLLEIGEGVVEVRATSGDNHLGGDDWDER | 3.25E-12 | 4.4375 |
| Enterobacteria phage T3 | MGGVATLR | 3.03E-13 | 4.4257 |
| Afipia carboxidovorans | HADATGR | 4.88E-10 | 4.38 |
| Acidovorax ebreus | QFAVAYLR | 1.52E-10 | 4.3629 |
| Fructilactobacillus sanfranciscensis | GYGFLTTDD | 2.37E-10 | 4.3069 |
| Leptospira biflexa Patoc | TDHTNASR | 1.40E-13 | 4.2996 |
| Streptomyces hygroscopicus | AATVEDHR | 7.14E-13 | 4.2571 |
| Danio rerio | EHVEEINELFYDAK | 1.21E-10 | 4.2553 |
| Brevibacillus parabrevis | SDDQVSIR | 7.94E-10 | 4.237 |
| Prochlorococcus marinus | SLVDDIEFSCEDASR | 1.02E-10 | 4.1518 |
| Peterkaempfera griseoplana | HEDHRPR | 4.20E-18 | 4.0908 |
| Metamycoplasma hominis | KLATGSNCILLDVK | 3.35E-09 | 4.0331 |
| Streptomyces griseus griseus | AGLPAQGR | 1.97E-11 | 4.0004 |
| Pasteurella multocida | RAGDVIPQIIGVLHEK | 1.63E-17 | 4.0002 |
| Rickettsia typhi | ESLKPVLKVPK | 1.29E-16 | 3.9677 |
| Dehalococcoides mccartyi | QILLAGGVAANNLLR | 1.14E-08 | 3.9524 |
| Bartonella henselae | TFGGGAK | 3.06E-16 | 3.908 |
| Polaromonas sp. | TPGIPPK | 2.56E-09 | 3.8388 |
| Maricaulis maris | NYGAEAK | 1.26E-13 | 3.8334 |
| Pelotomaculum thermopropionicum | SVALAGR | 8.31E-15 | 3.8181 |
| Legionella pneumophila | TDYPDMLLFYRMGDFYELFFDDAK | 1.97E-15 | 3.7946 |
| Rattus norvegicus | ATQGEQDNYEMHVR | 3.63E-11 | 3.7297 |
| Onion yellows phytoplasma | VIVEPDK | 7.61E-09 | 3.7099 |
| Chlorobaculum tepidum | NFCSSCSK | 4.88E-15 | 3.6992 |
| Streptomyces anulatus | ASLMCEQQAAVAAAR | 4.84E-08 | 3.6968 |
| Mentha piperita | DLQEWSGEIGSDIPFFFSHGAAYCTGR | 6.85E-16 | 3.6886 |
| Geobacter sp. | VTDGGKGSLELTTTTSQGITFR | 1.16E-10 | 3.6598 |
| Lactobacillus gasseri | AFDALYDEDK | 7.63E-12 | 3.5467 |
| Bifidobacterium bifidum | TVYVGCR | 4.34E-09 | 3.5143 |
| Caulobacter vibrioides | LPAGKLNKPK | 3.50E-07 | 3.4708 |
| Cereibacter sphaeroides | YSFDMGEEATR | 2.79E-09 | 3.463 |
| Salinispora tropica | TMYVIPFCMGPVEAK | 9.73E-09 | 3.3793 |
| Mycobacteroides abscessus | VDLVFGANSELR | 1.91E-07 | 3.3481 |
| Salinispora arenicola | DGSLTCTLFMAHEGPVSFAALDTPAAVR | 2.01E-12 | 3.3457 |
| Aliarcobacter butzleri | LTGNSKNAQEMVEK | 2.32E-13 | 3.3013 |
| Eubacterium barkeri | DEPCLVDDK | 4.01E-13 | 3.2914 |
| Streptococcus pyogenes M5 | APVDAPK | 9.44E-07 | 3.2536 |
| Spermophilus citellus | IGGHGAEYGAEALER | 1.89E-06 | 3.2528 |
| Neisseria meningitidis B / 15 | EKGIGVAK | 2.40E-08 | 3.2444 |
| Lactobacillus acidophilus | VIGKYLILLDAK | 3.09E-07 | 3.193 |
| Carboxydothermus hydrogenoformans | MAALGLKLLK | 5.60E-07 | 3.1684 |
| Listeria monocytogenes 4b | ADGTTGK | 2.30E-06 | 3.1206 |
| Streptomyces albus | TSGDRGGR | 6.15E-07 | 3.0913 |
| Actinomyces naeslundii | KYNTSTLGR | 3.32E-15 | 3.0858 |
| Gemmatimonas aurantiaca | QAAASAA | 7.17E-14 | 3.0202 |
| Corynebacterium glutamicum | SAITFSETLAK | 6.49E-07 | 2.9883 |
| Jannaschia sp. | TENGTEPDSEK | 6.68E-13 | 2.971 |
| Paenibacillus polymyxa | KLYVSLVK | 4.45E-07 | 2.9577 |
| Staphylococcus aureus | GQQSGEDDLNAMK | 2.22E-06 | 2.9497 |
| Phocaeicola vulgatus | QKGGGGAR | 1.09E-06 | 2.9493 |
| Vibrio parahaemolyticus | DDLLGMAK | 3.92E-06 | 2.9443 |
| Agrobacterium tumefaciens | GERVDIR | 9.82E-08 | 2.9349 |
| Streptococcus pyogenes M12 | HETIYQAVKEK | 1.47E-08 | 2.8175 |
| Chlorobaculum parvum | YQEEESGKAEWVAVR | 4.40E-06 | 2.7379 |
| Salmonella heidelberg | SPSDVPINWK | 7.97E-08 | 2.7133 |
| Saimiri boliviensis boliviensis | LQAEAFQAR | 8.01E-07 | 2.6903 |
| Edwardsiella ictaluri | DLADGHA | 2.42E-10 | 2.6616 |
| Actinobacillus pleuropneumoniae 3 | VEGDEQITFTR | 5.50E-09 | 2.6036 |
| Arthrobacter sp. | LPGTVQQWRPGAAK | 3.53E-11 | 2.5605 |
| Escherichia coli O127:H6 | KELNLALYSR | 8.73E-06 | 2.5183 |
| Rhodococcus opacus | DPHALEIAGGRLAPFADR | 2.66E-13 | 2.5121 |
| Desulforapulum autotrophicum | GIMYSDER | 3.78E-12 | 2.4989 |
| Clostridium perfringens | FVDQSEYER | 2.83E-06 | 2.4651 |
| Neisseria meningitidis A / 4A | FNFRFSTESTEAGLK | 8.49E-07 | 2.4351 |
| Priestia megaterium | VEPAPCGD | 0.000112 | 2.4318 |
| Campylobacter fetus fetus | IITSSIKEK | 0.000457 | 2.4078 |
| Xylella fastidiosa | GPIGAAK | 0.000798 | 2.334 |
| Psychrobacter sp. | SFEPHEPDSR | 2.79E-08 | 2.3272 |
| Borrelia recurrentis | DHNTESKDIPLK | 2.93E-06 | 2.3246 |
| Rhodospirillum rubrum | LPRLSPPR | 3.38E-08 | 2.3158 |
| Acidianus filamentous virus 1 | LNPLDHR | 5.74E-11 | 2.2396 |
| Blochmanniella pennsylvanica | SEGVHAR | 6.66E-05 | 2.2199 |
| Methylacidiphilum infernorum | MLDIPEGLWTKCPGCNR | 0.0006 | 2.2005 |
| Streptococcus pneumoniae | HLLKADETFGIR | 3.55E-06 | 2.1586 |
| Aquifex pyrophilus | GIPMATPAFEGADEK | 0.000957 | 2.1574 |
| Corynebacterium nephridii | MMAPHFAQVAK | 2.86E-05 | 2.1485 |
| Streptococcus pneumoniae | DIDISRAER | 6.30E-05 | 2.1249 |
| Latilactobacillus sakei | APDAEAK | 0.001554 | 2.1021 |
| Myxococcus xanthus | VDLIDVTDPTGK | 0.001907 | 2.0753 |
| Mycoplasma pneumoniae | AGAVGYDMTTDSNASTK | 3.31E-07 | 2.039 |
| Neorickettsia sennetsu | IHIVGDDIFVTNPK | 0.003386 | 2.0233 |
| Sporosarcina ureae | YSIQGLGK | 5.56E-05 | 1.9839 |
| Methylobacterium radiotolerans | LVLADVITHVIRSTKPK | 0.000129 | 1.9785 |
| Pseudarthrobacter chlorophenolicus | GLPSAVVNGSAADAEAVWR | 0.002911 | 1.9625 |
| Canis lupus familiaris | FSGSGSGTDFTLR | 2.17E-09 | 1.9595 |
| Rhodococcus opacus | AGYKVTVLEAR | 9.39E-12 | 1.9129 |
| Staphylococcus aureus | LGFKGGEK | 0.000481 | 1.8869 |
| Campylobacter jejuni | FGGKGVLK | 0.000292 | 1.8376 |
| Chlorobium phaeobacteroides | QEFNDAQSGGKR | 0.006345 | 1.8256 |
| Solidesulfovibrio fructosivorans | CGACYDKCK | 0.012912 | 1.8254 |
| Amycolatopsis orientalis | RVFCAGINLK | 0.002579 | 1.8246 |
| Trichodesmium erythraeum | GNANSGNK | 0.014101 | 1.8021 |
| Cupriavidus necator | KPLPGTK | 0.017949 | 1.7865 |
| Bacillus atrophaeus | EYGNESGCR | 0.005581 | 1.7579 |
| Phytoplasma mali | GIDIEIPK | 0.001194 | 1.7468 |
| Streptomyces scabiei | ADWEWTDQVLQDAVDRLGR | 0.000615 | 1.7316 |
| Acholeplasma laidlawii | HLKSLSDLLR | 0.007258 | 1.7289 |
| Frankia alni | EQYSRDPR | 2.93E-06 | 1.7257 |
| Nitrosomonas europaea | EVTEGRFSND | 0.000403 | 1.7204 |
| Streptococcus agalactiae V | YDATIAR | 4.64E-06 | 1.7156 |
| Marinobacter nauticus | YCTENTAESLEER | 0.000305 | 1.6953 |
| Geobacillus stearothermophilus | DDGQTDEAK | 0.001733 | 1.6809 |
| Paraburkholderia phytofirmans | GLLIGAAQ | 0.000101 | 1.6068 |
| Acetoanaerobium sticklandii | LLLGLVGAFVFVLSALK | 4.27E-05 | 1.589 |
| Escherichia coli O111:H- | FTKAMLEGK | 8.06E-10 | 1.5831 |
| Pseudomonas aeruginosa | EVNEAVAR | 0.022833 | 1.5614 |
| Frankia sp. | TIPTPIR | 0.046521 | 1.5601 |
| Streptantibioticus cattleyicolor | KVGPSHVVR | 6.60E-13 | 1.5316 |
| Limosilactobacillus reuteri reuteri | QLGAPTDFTFHIR | 6.94E-06 | 1.529 |
| Neisseria meningitidis C | FEIGLDKPK | 2.47E-05 | 1.5229 |
| Salmonella typhimurium | LDYVIPSR | 1.50E-05 | 1.5143 |
| Clostridium botulinum | DSEEEENLQK | 0.015619 | 1.4628 |
| Rickettsia felis | FLSLIIVILILYNIVK | 0.053833 | 1.4508 |
| Bacillus sp. | ERAADIR | 2.84E-05 | 1.4286 |
| Rickettsia prowazekii | EVAATQENNKK | 0.034945 | 1.4226 |
| Thiobacillus denitrificans | FMETQAEISAARLDAK | 1.44E-05 | 1.3415 |
| Bordetella petrii | CAALLLPDLARR | 3.94E-05 | 1.3293 |
| Mycobacterium avium | FVAREAGPHGVR | 0.00446 | 1.3181 |
| Ralstonia pickettii | GEGEDAK | 0.01223 | 1.3005 |
| Leptolyngbya boryana | RFQAASQQQAR | 4.86E-05 | 1.2799 |
| Methanococcus maripaludis | THSDIHIETAQEFYSK | 0.066387 | 1.262 |
| Corynebacterium glutamicum | TFEACEGAK | 0.157324 | 1.2326 |
| Salmonella dublin | EPRASGLDDMTYR | 0.006602 | 1.2273 |
| Buchnera aphidicola | IIKLSLLK | 0.154858 | 1.2154 |
| Bacillus sp. | VVILSQKLK | 1.90E-08 | 1.2111 |
| Methylophilus methylotrophus | KPVLGVGR | 0.104685 | 1.177 |
| Rhodococcus jostii | MTSDIVVIGGGVAGVTAAQSLR | 4.21E-07 | 1.1686 |
| Agrobacterium tumefaciens | IFETDNSPITSK | 0.155786 | 1.1646 |
| Halomonas elongata | HTEAPYYYHRAAEQEGMTER | 0.00282 | 1.1458 |
| Methylocella silvestris | MPGDGPK | 0.015364 | 1.0998 |
| Streptomyces fradiae | HGIPVPR | 0.00266 | 1.0945 |
| Campylobacter lari | DSGVEVIIGLK | 0.096146 | 1.0616 |
| Pectobacterium atrosepticum | GQSEDFYK | 0.00018 | 1.0615 |
| Clostridium perfringens | ESLLITK | 0.01132 | 1.0599 |
| Mesorhizobium japonicum | FNGTPEGDWS | 0.051109 | 1.0517 |
| Bacillus spizizenii | FVLKNGK | 0.020049 | 1.05 |
| Herminiimonas arsenicoxydans | FDQQASLTEARR | 0.000111 | 1.0356 |
| Chlorobium phaeovibrioides | SSMGFGAGVADKK | 0.000146 | 1.0281 |
| Cereibacter sphaeroides | YGHAAFEGGMGGGGGAR | 0.009097 | 1.0265 |
| Halorhodospira halophila | MHEAYCR | 0.000815 | 0.9987 |
| Thermotoga sp. | TLKELIVK | 0.295077 | 0.96867 |
| Escherichia coli O45:K1 | MELVLKDAQSALTVSETTFGR | 0.122889 | 0.96174 |
| Clostridium botulinum | AEYLVQFAMMGK | 0.300921 | 0.95051 |
| Streptomyces exfoliatus | EHVVTEQFR | 0.01898 | 0.94913 |
| Escherichia coli O6:H1 | GYDALLSRVTAVEPLQFCTK | 0.000133 | 0.94697 |
| Campylobacter curvus | KMSDTGK | 0.007437 | 0.92668 |
| Helicobacter pylori | YIGMSVLGMSVFENGCF | 0.05282 | 0.92411 |
| Neisseria meningitidis C | DPAKPGK | 0.006549 | 0.91532 |
| Streptomyces sp. | DDFGKQNVGTYR | 0.001364 | 0.88288 |
| Chlamydia felis | YAELGNCVFEGRDMGSK | 0.114716 | 0.87689 |
| Lachnoclostridium phytofermentans | GPTGVGR | 0.291732 | 0.86938 |
| Hahella chejuensis | CNMETAPGQHGQR | 0.191961 | 0.86593 |
| Novosphingobium aromaticivorans | QYKLPAK | 0.299374 | 0.86258 |
| Hydrogenovibrio crunogenus | MKAIYWEEENMGMK | 0.040595 | 0.85229 |
| Streptococcus pneumoniae | EHYMPTSAEGELPESKVGAVLAIADK | 0.048772 | 0.83005 |
| Escherichia coli O7:K1 | NGVAIGAHPSYPDR | 0.094733 | 0.81732 |
| Koribacter versatilis | RVLVVGLGK | 0.32583 | 0.80802 |
| Streptomyces venezuelae | EAGFPDLDGATR | 0.019361 | 0.7964 |
| Bacillus subtilis | HTVNALLEKGLSHSR | 0.172509 | 0.79459 |
| Neisseria meningitidis C | AFAEPFYK | 2.75E-06 | 0.79332 |
| Neisseria meningitidis B | EHQLQDGIMR | 0.027971 | 0.77737 |
| Streptomyces galilaeus | FDTGGFDRTK | 0.000942 | 0.77498 |
| Streptomyces hygroscopicus | THEANVSSLMLNCDR | 0.004295 | 0.75366 |
| Magnetococcus marinus | AAAAILK | 0.136876 | 0.73769 |
| Lactobacillus johnsonii | EDDKNEK | 0.408228 | 0.73297 |
| Vibrio atlanticus | ENEMCDDLAR | 7.09E-08 | 0.72723 |
| Borreliella burgdorferi | KIALILGNEGK | 2.92E-06 | 0.71659 |
| Clostridium novyi | IILPAIDLRMGK | 0.208571 | 0.71366 |
| Chlorobium luteolum | TSQAGDDSASR | 0.090929 | 0.71292 |
| Sulfurovum sp. | LTGNCKR | 0.026691 | 0.71052 |
| Hydrogenobaculum sp. | SGFILSKQEFAK | 3.31E-11 | 0.67316 |
| Alkalilimnicola ehrlichii | KPGLAPA | 0.410121 | 0.67195 |
| Desulforamulus reducens | QGEQVAE | 0.002218 | 0.65829 |
| Nitrobacter winogradskyi | VMAELNPPST | 4.07E-05 | 0.65161 |
| Albidiferax ferrireducens | SAQNILQALEKSK | 0.047616 | 0.62967 |
| Amycolatopsis mediterranei | EPEPVLSVTR | 0.216717 | 0.62546 |
| Rhodopseudomonas palustris | WAMGETSHK | 0.009993 | 0.61482 |
| Shouchella clausii | EAADEAEQYFK | 0.000635 | 0.61371 |
| Escherichia coli | DNNSDSKGVMDK | 5.16E-08 | 0.60668 |
| Mycolicibacterium gilvum | LEAAGASVTVK | 0.103012 | 0.59603 |
| Clostridium sporogenes | ECKTDFSNK | 0.005556 | 0.5944 |
| Sorangium cellulosum | KYAALGDVIVVSIK | 0.580036 | 0.59262 |
| Mycobacterium tuberculosis | VLGAVADAIETPK | 0.027679 | 0.59172 |
| Porphyromonas endodontalis | EIVDVTPR | 0.345784 | 0.57985 |
| Treponema pallidum | ICGVAADGINYVASVVISATIAASIK | 0.055228 | 0.57521 |
| Thermomicrobium roseum | YIAEADK | 0.249352 | 0.57334 |
| Streptomyces carzinostaticus | ALCEPLDADEAAR | 0.028208 | 0.55647 |
| Agrobacterium tumefaciens | DSTDAEVNPK | 0.011409 | 0.55557 |
| Leptothrix cholodnii | FITSGPHTGQR | 0.01387 | 0.54525 |
| Beutenbergia cavernae | TGTGIDAVEWAAEATSR | 0.004263 | 0.54094 |
| Streptomyces lividans | AVDSTVRGFEDVVK | 0.541777 | 0.53288 |
| Pelobacter propionicus | GYVTTIKSAK | 0.403457 | 0.52389 |
| Micrococcus luteus | HTPFYSNYR | 0.002358 | 0.52142 |
| Kosmotoga olearia | TEEEGNE | 0.61396 | 0.51935 |
| Micrococcus luteus | ALDFDRQAALGCR | 0.171517 | 0.51778 |
| Thermobifida fusca | WTADEVAYAK | 0.305237 | 0.50847 |
| Streptomyces albus G | IRGGYLVSK | 0.000111 | 0.50813 |
| Caldicellulosiruptor saccharolyticus | DDVTWTSK | 0.036603 | 0.50337 |
| Mycobacterium tuberculosis | LRPGPLRPAER | 0.345505 | 0.50026 |
| Bifidobacterium longum | RNPLGGR | 0.450449 | 0.48017 |
| Trichormus variabilis | AAAALVK | 0.537809 | 0.47479 |
| Desulfovibrio desulfuricans | GISGKAK | 0.331555 | 0.46998 |
| Salmonella enteritidis | MTEIAQK | 0.016102 | 0.46904 |
| Mycolicibacterium flavescens | VASVTDSGVQPVYSLR | 0.403809 | 0.46859 |
| Gloeobacter violaceus | APDYATEGR | 0.000814 | 0.46804 |
| Cronobacter sakazakii | GYYMEDIQAIYR | 0.001185 | 0.46397 |
| Staphylococcus xylosus | ADSEYGK | 0.632661 | 0.45922 |
| Burkholderia pseudomallei | FCTPEGAMEFR | 0.203448 | 0.45425 |
| Pseudomonas knackmussii | IALGHDDPPTALYELAR | 0.50321 | 0.45283 |
| Acinetobacter baylyi | SGIGALR | 0.6775 | 0.43585 |
| Brucella melitensis biotype 1 | ASVWTAMANAYVDLPR | 0.000187 | 0.43349 |
| Rhodobacter capsulatus | LPPGDVVK | 0.438469 | 0.4318 |
| Streptomyces lavendulae | FDVFAGDTPSGR | 0.292527 | 0.43055 |
| Helicobacter pylori | MHPGNNVGMGK | 0.616945 | 0.4152 |
| Nautilia profundicola | LLNNNPEK | 0.246786 | 0.41258 |
| Gluconobacter oxydans | EHPEMASEIER | 0.490907 | 0.41144 |
| Ligilactobacillus salivarius | DLEHMFK | 0.453203 | 0.39757 |
| Thermodesulfovibrio yellowstonii | QKLELNLIGIK | 0.1109 | 0.39557 |
| Heliobacterium modesticaldum | IGPGFRFG | 0.003488 | 0.39229 |

**Supplementary Tabe 4: Metabolites bound to SAH Non-survivors HMA**

| Compound | Label | Pval | FC |
| --- | --- | --- | --- |
| L-Cystathionine | C02291 | 6.92E-20 | 5.7296 |
| Aspartylphenylalanine | HMDB0000706 | 7.84E-13 | 3.4629 |
| N,N-Dimethylhistidine | C04259 | 3.31E-11 | 3.3335 |
| N-Docosahexaenoyl GABA | HMDB0062332 | 7.17E-08 | 2.7799 |
| Enterolactone | C18165 | 4.95E-09 | 2.5568 |
| Cytosine | C00380 | 2.90E-10 | 2.2504 |
| 2,3,4,5-Tetrahydro-2-pyridinecarboxylic acid | C00450 | 0.003719282 | 2.0675 |
| N6,N6,N6-Trimethyl-L-lysine | C03793 | 3.09E-05 | 2.0484 |
| Glycylproline | HMDB0000721 | 6.17E-07 | 2.0267 |
| Hexadecanedioic acid | C19615 | 3.53E-06 | 2.0127 |
| Butyrylcarnitine | C02862 | 2.82E-10 | 1.9916 |
| CerP(d18:1/12:0) | HMDB10699 | 9.56E-06 | 1.9868 |
| Dimethyl selenide | HMDB33212 | 4.51E-09 | 1.9782 |
| Sedoheptulose | HMDB03219 | 3.62E-05 | 1.9505 |
| Methylguanidine | HMDB01522 | 2.01E-09 | 1.8614 |
| N-Acetyl-L-tyrosine | C01657 | 0.010200922 | 1.8508 |
| 1-Methylhistamine | HMDB0000898 | 2.30E-09 | 1.7269 |
| Suberylglycine | HMDB00953 | 0.002429004 | 1.6974 |
| Tetradecanoylcarnitine | HMDB0005066 | 0.000639672 | 1.6738 |
| 3-Hydroxy-cis-5-octenoylcarnitine | HMDB0240766 | 7.29E-16 | 1.6711 |
| Putrescine | HMDB0001414 | 8.52E-11 | 1.6524 |
| Quinolinic acid | HMDB00232 | 0.000674453 | 1.5968 |
| 4-Oxoproline | C01877 | 6.44E-13 | 1.5834 |
| Tyramine | HMDB00306 | 1.48E-05 | 1.3821 |
| 3-Hydroxytetradecanedioic acid | HMDB0000394 | 1.39E-05 | 1.3757 |
| Indole-3-propionic acid | HMDB0002302 | 1.03E-05 | 1.368 |
| Palmitoylglycine | HMDB0013034 | 0.00920871 | 1.3143 |

**Supplementary Tabe 5: Proteins bound to SAH Non-survivors HMA**

| Label | Pval | FC |
| --- | --- | --- |
| PRMT1 | 1.35E-21 | 10.999 |
| PCNX4 | 1.66E-21 | 8.8309 |
| DOCK6 | 2.32E-21 | 8.4271 |
| DAOA | 4.92E-21 | 8.3602 |
| CPNE5 | 2.17E-21 | 8.1489 |
| NUAK2 | 2.80E-21 | 8.0947 |
| RAPGEFL1 | 5.25E-21 | 8.0526 |
| EVX1 | 2.04E-21 | 7.9218 |
| ABCD2 | 2.61E-21 | 7.9023 |
| USP13 | 2.16E-21 | 7.8652 |
| RNF208 | 1.50E-20 | 7.8134 |
| KHDRBS1 | 3.51E-21 | 7.7476 |
| ISYNA1 | 4.96E-20 | 7.6794 |
| SPATA6L | 1.33E-19 | 7.6549 |
| UBL4B | 2.35E-20 | 7.4336 |
| NTF3 | 2.34E-19 | 7.3873 |
| CDC73 | 3.18E-21 | 7.3431 |
| DUS4L | 3.52E-21 | 7.3119 |
| CTCFL | 1.16E-20 | 7.1637 |
| RCC1L | 1.09E-20 | 7.151 |
| VRK3 | 5.44E-21 | 7.103 |
| GPR50 | 4.63E-21 | 7.0499 |
| SSR1 | 2.07E-20 | 7.0464 |
| NLRX1 | 5.75E-21 | 6.9896 |
| OR2AK2 | 2.69E-19 | 6.8458 |
| TRIP13 | 5.35E-18 | 6.804 |
| PEBP4 | 9.21E-21 | 6.7547 |
| RPH3AL | 1.24E-20 | 6.7286 |
| TMEM62 | 7.58E-21 | 6.7229 |
| TIMP3 | 1.84E-17 | 6.6996 |
| RCBTB1 | 1.92E-20 | 6.6866 |
| NIFK | 6.39E-21 | 6.6798 |
| PLA2G4D | 9.06E-21 | 6.6616 |
| OR1A2 | 1.02E-17 | 6.6545 |
| RAP1GAP2 | 1.80E-20 | 6.6475 |
| GRM6 | 6.48E-17 | 6.6078 |
| IMPG2 | 1.40E-18 | 6.6068 |
| DYNLL1 | 8.81E-17 | 6.5572 |
| ZNF776 | 1.21E-19 | 6.5423 |
| ALDH6A1 | 1.46E-16 | 6.4447 |
| NAXE | 2.49E-20 | 6.4398 |
| CRISPLD2 | 2.04E-18 | 6.3997 |
| CCDC185 | 6.33E-18 | 6.3699 |
| ABCC2 | 2.81E-17 | 6.3322 |
| PIN4 | 2.17E-17 | 6.3127 |
| REM1 | 8.31E-20 | 6.2244 |
| ACVR2A | 8.83E-20 | 6.1896 |
| TMCO5A | 4.00E-17 | 6.1865 |
| HPF1 | 4.01E-20 | 6.1627 |
| GRIK1 | 4.12E-20 | 6.0005 |
| PRAMEF27 | 6.01E-19 | 5.9897 |
| HSD11B2 | 3.41E-19 | 5.949 |
| SLC6A11 | 8.49E-15 | 5.9011 |
| CHTOP | 1.12E-17 | 5.8161 |
| GRSF1 | 8.44E-20 | 5.7989 |
| LIPC | 2.69E-19 | 5.7732 |
| CDR2 | 2.46E-19 | 5.768 |
| OR1L3 | 6.88E-16 | 5.759 |
| OR6N2 | 4.24E-14 | 5.6976 |
| PDYN | 6.65E-16 | 5.675 |
| SYTL1 | 1.67E-17 | 5.6577 |
| MANSC4 | 2.30E-16 | 5.6558 |
| BRINP1 | 4.14E-19 | 5.638 |
| ITGAD | 6.83E-17 | 5.6327 |
| CPOX | 1.27E-17 | 5.6097 |
| ACTRT3 | 1.23E-14 | 5.6093 |
| EFCAB9 | 2.97E-16 | 5.5937 |
| TSSK1B | 3.49E-19 | 5.5825 |
| INSRR | 2.45E-15 | 5.565 |
| USP48 | 2.63E-17 | 5.5621 |
| TCN1 | 9.81E-19 | 5.5513 |
| TADA2A | 1.40E-16 | 5.5168 |
| TLE3 | 3.75E-14 | 5.4982 |
| ELL | 3.97E-18 | 5.4968 |
| PIH1D2 | 9.86E-14 | 5.4704 |
| SLC25A14 | 3.84E-15 | 5.4606 |
| SLC25A28 | 1.14E-18 | 5.4588 |
| PDE11A | 1.11E-15 | 5.4576 |
| TSGA10 | 1.32E-14 | 5.4489 |
| FAM131C | 5.00E-19 | 5.4251 |
| MMP21 | 8.23E-19 | 5.4074 |
| PWP2 | 2.09E-17 | 5.3936 |
| ENOX2 | 1.58E-18 | 5.3722 |
| HOXB3 | 9.42E-18 | 5.3494 |
| KATNAL1 | 7.24E-18 | 5.3436 |
| BAZ1A | 2.00E-13 | 5.3133 |
| ZNF431 | 9.30E-14 | 5.313 |
| P2RX3 | 1.18E-17 | 5.3116 |
| TRAPPC10 | 2.03E-14 | 5.3031 |
| FAAP100 | 4.51E-15 | 5.2988 |
| ZNF330 | 1.69E-15 | 5.2923 |
| NPAT | 1.23E-18 | 5.2874 |
| SPINK9 | 1.82E-17 | 5.2677 |
| ENPEP | 4.68E-14 | 5.2604 |

**Supplementary Tabe 6: Lipids bound to SAH Non-survivors HNA1**

|  | Pval | FC |
| --- | --- | --- |
| TG(17:2(9Z,12Z)/20:5(5Z,8Z,11Z,14Z,17Z)/20:5(5Z,8Z,11Z,14Z,17Z))[iso3] | 2.15E-21 | 7.977 |
| PC(O-14:0/18:2(9Z,12Z)) | 3.12E-21 | 7.5545 |
| PA(P-18:0/17:2(9Z,12Z)) | 3.82E-21 | 6.8374 |
| Tetranor-PGE1 | 2.01E-21 | 6.4944 |
| TG(18:4(6Z,9Z,12Z,15Z)/18:4(6Z,9Z,12Z,15Z)/18:4(6Z,9Z,12Z,15Z)) | 4.00E-20 | 5.9182 |
| PC(14:0/18:1(11Z)) | 4.08E-20 | 5.626 |
| omega-linoleoyloxy-Cer(d19:1/34:0) | 4.11E-19 | 5.5936 |
| 11-cis-Retinol | 3.36E-18 | 5.4027 |
| PG(15:0/20:5(5Z,8Z,11Z,14Z,17Z)) | 1.29E-20 | 5.3448 |
| CL(1'-[16:0/18:0],3'-[18:2(9Z,12Z)/20:4(5Z,8Z,11Z,14Z)]) | 4.20E-18 | 5.2221 |
| PE(P-16:0/16:1(9Z)) | 3.80E-17 | 5.195 |
| PI(22:2(13Z,16Z)/22:4(7Z,10Z,13Z,16Z)) | 1.73E-17 | 5.1842 |
| all-trans-retinylPalmitate | 2.60E-18 | 5.1805 |
| DG(17:2(9Z,12Z)/20:3(8Z,11Z,14Z)/0:0)[iso2] | 2.53E-18 | 5.1763 |
| PG(O-16:0/0:0) | 1.50E-17 | 4.9758 |
| PA(22:0/22:4(7Z,10Z,13Z,16Z)) | 6.63E-15 | 4.8518 |
| PC(16:0/15:1(14)) | 1.10E-15 | 4.7474 |
| LacCer(d16:0/20:0) | 8.89E-16 | 4.4812 |
| PG(13:0/20:5(5Z,8Z,11Z,14Z,17Z)) | 2.77E-17 | 4.4329 |
| PC(20:0/22:5(7Z,10Z,13Z,16Z,19Z)) | 3.34E-17 | 4.405 |
| PS(12:0/15:1(9Z)) | 1.39E-16 | 4.1981 |
| PS(O-20:0/14:1(9Z)) | 1.63E-13 | 4.1231 |
| PC(12:0/18:1(9Z)) | 5.85E-11 | 4.0497 |
| OOV-PC | 3.04E-15 | 4.0019 |
| PE(P-16:0/15:1(9Z)) | 1.17E-09 | 3.9459 |
| 12,14-Pentacosadiynoic acid | 5.76E-16 | 3.7761 |
| LacCer(d16:0/18:0) | 2.48E-15 | 3.6484 |
| 1alpha-hydroxy-24-(dimethylphosphoryl)-25,26,27-trinorvitamin D3 | 4.16E-19 | 6.2194 |
| 3-Deoxy-3-azido-25-hydroxyvitamin D3 | 2.00E-20 | 5.9002 |
| 19-norcholestenone | 5.57E-17 | 5.1095 |
| Ascorbyl palmitate | 1.23E-15 | 4.9938 |
| N-(2-fluoro-ethyl) 2-methyl-arachidonoyl amine | 1.00E-18 | 4.4713 |
| 34:6(16Z,19Z,22Z,25Z,28Z,31Z) | 1.21E-17 | 4.176 |
| 1-Fluoro-25-hydroxy-16-ene-23-yne-26,27-hexadeuterovitamin-D3 | 3.94E-18 | 3.6574 |
| TG(17:1(9Z)/20:5(5Z,8Z,11Z,14Z,17Z)/20:5(5Z,8Z,11Z,14Z,17Z))[iso3] | 4.38E-15 | 3.6433 |
| PS(16:1(9Z)/20:5(5Z,8Z,11Z,14Z,17Z)) | 6.49E-14 | 3.6336 |
| Dodecaprenyl phosphate-galacturonic acid | 1.02E-09 | 3.6295 |
| 2-(9R-(tricosanoyloxy)-3-methyl-2Z-decenoyloxy)-ethanesulfonic acid | 2.53E-08 | 3.5411 |
| 16-bromo-9E-hexadecenoic acid | 4.23E-12 | 3.51 |
| PG | 7.17E-11 | 3.505 |
| MGDG(18:5(3Z,6Z,9Z,12Z,15Z)/18:5(3Z,6Z,9Z,12Z,15Z)) | 5.47E-13 | 3.502 |
| PE(P-16:0/14:1(9Z)) | 6.50E-13 | 3.501 |
| 27:2(5Z,9Z)(6Br) | 7.53E-10 | 3.4498 |
| MGMG(18:2(9Z,12Z)/0:0) | 1.29E-17 | 3.4227 |
| 17-phenyl-trinor-PGE2 | 4.73E-12 | 3.3967 |
| 26,27-bisnor-22-dehydro-cholesterol | 3.72E-17 | 3.3553 |
| Fuc-GM1(d18:1/24:1(15Z)) | 5.48E-14 | 3.3479 |
| 17,18-dehydro-clavulone I | 7.37E-10 | 3.2718 |
| PC(O-16:1(11Z)/0:0) | 3.29E-14 | 3.2511 |
| TG(12:0/22:6(4Z,7Z,10Z,13Z,16Z,19Z)/22:6(4Z,7Z,10Z,13Z,16Z,19Z))[iso3] | 3.94E-13 | 3.2476 |
| Archaetidylglycerol-myo-inositol | 1.01E-11 | 3.2212 |
| (7Z,10Z,13Z,16Z,19Z)-docosapentaenoylcarnitine | 1.09E-10 | 3.2098 |
| PG(P-20:0/22:4(7Z,10Z,13Z,16Z)) | 5.06E-12 | 3.2057 |
| N-oleoyl taurine | 2.57E-12 | 3.1903 |
| PG(15:1(9Z)/22:4(7Z,10Z,13Z,16Z)) | 7.02E-12 | 3.1505 |
| 22:2-Glc-Sitosterol | 2.67E-12 | 3.1206 |
| 11beta 17alpha 21-Trihydroxy-5beta-pregnane-3 20-dione | 3.23E-13 | 3.1197 |
| [ST(2:0)]5alpha-cholesta-8 24-dien-3beta-ol | 2.24E-12 | 3.1056 |
| LacCer(d16:0/16:0) | 1.93E-11 | 3.1017 |
| PIM3(19:2(9Z,12Z)/18:1(9Z)) | 1.44E-08 | 3.0269 |
| tetracosatetraenoic acid n-6 | 8.31E-10 | 3.013 |
| LeukotrieneC4 | 2.94E-13 | 2.9961 |
| PG(15:0/22:6(4Z,7Z,10Z,13Z,16Z,19Z)) | 6.96E-12 | 2.9298 |
| PA(18:3(9Z,12Z,15Z)/18:3(9Z,12Z,15Z)) | 1.02E-11 | 2.8278 |
| PC(18:0/11:1(10E)) | 1.04E-10 | 2.8107 |
| 3,7-Dimethyl-8,11-dioxo-2E,6E,9E-dodecatrienal | 5.55E-11 | 2.764 |
| DGDG(18:2(9Z,12Z)/14:0) | 6.49E-10 | 2.733 |
| 2'-eicosa-15S-hydroxy-5Z,8Z,11Z,13E,17Z-pentaenoylphloroglucinol | 6.12E-15 | 2.7277 |
| asialo-GM2(d18:1/22:0) | 4.53E-11 | 2.7163 |
| PI(12:0/20:4(5Z,8Z,11Z,14Z)) | 8.93E-09 | 2.6958 |
| Asperitaconic acid C | 4.05E-08 | 2.6925 |
| Tetracosanoyl-CoA | 2.47E-11 | 2.6906 |
| OHODiA-PA | 6.33E-11 | 2.6851 |
| PA(21:0/22:4(7Z,10Z,13Z,16Z)) | 5.55E-09 | 2.6709 |
| (+/-)N-(2-fluoro-ethyl)-2,16-dimethyl-5Z,8Z,11Z,14Z-docosatetraenoyl amine | 5.34E-10 | 2.6688 |
| MGTS(20:0/0:0) | 1.36E-10 | 2.6641 |
| 2-arachidonoyl glycerol-d5 | 1.29E-18 | 2.659 |
| PG(20:2(11Z,14Z)/0:0) | 5.33E-10 | 2.6575 |
| 2-Methyl-6-oxohepta-2 4-dienal | 8.62E-10 | 2.6568 |
| 3-Buten-2-one | 1.34E-09 | 2.6526 |
| 1alpha-hydroxy-24-(dimethoxyphosphoryl)-25,26,27-trinorvitamin D3 | 1.78E-05 | 2.6452 |
| PS(20:0/0:0) | 1.61E-07 | 2.6274 |
| GlcCer(d18:1(8E)/18:0(2OH[R])) | 2.36E-11 | 2.6235 |
| PHODiA-PC | 4.99E-13 | 2.6008 |
| PA(22:1(11Z)/22:4(7Z,10Z,13Z,16Z)) | 1.20E-10 | 2.5874 |
| N-(2E-dodecenoyl)-homoserine lactone | 9.59E-15 | 2.5774 |
| N-docosahexaenoyl phenylalanine | 4.14E-09 | 2.5528 |
| PC(P-16:0/14:1(9Z)) | 1.55E-09 | 2.5427 |
| 32:6(14Z,17Z,20Z,23Z,26Z,29Z) | 6.09E-07 | 2.5095 |
| GM4(d18:1/20:0) | 1.51E-07 | 2.501 |
| CL(1'-[18:2(9Z,11E)(13OOH)/18:2(9Z,12Z)],3'- [18:2(9Z,12Z)/18:2(9Z,12Z)]) | 6.52E-12 | 2.4852 |
| OON-PA | 5.85E-12 | 2.4822 |
| PS(12:0/20:3(8Z,11Z,14Z)) | 8.56E-09 | 2.4638 |
| 4,8,12,15,19,21-tetracosahexaenoic acid | 1.84E-09 | 2.3993 |
| PI(O-18:0/18:4(6Z,9Z,12Z,15Z)) | 1.52E-07 | 2.3542 |
| 1- lignoceryl glycerone-3-phosphate | 5.11E-08 | 2.3522 |
| all-trans-Retinoyl-beta-glucuronide | 2.19E-10 | 2.3516 |
| O-(11-carboxyundecanoyl)carnitine | 1.16E-09 | 2.3377 |
| PIM3(18:1(9Z)/18:1(9Z)) | 1.58E-08 | 2.3253 |
| 5,6-dichloro-tetradecanoic acid | 5.17E-13 | 2.3171 |
| PIM4(19:1(9Z)/16:2(9Z,12Z)) | 5.09E-06 | 2.3155 |
| 24,24-Difluoro-25-hydroxy-26,27-dimethylvitamin D3 | 1.42E-08 | 2.3141 |
| PS(14:0/12:0) | 7.71E-08 | 2.2524 |
| TG(14:1(9Z)/14:1(9Z)/15:1(9Z))[iso3] | 3.26E-09 | 2.2398 |
| sn-3-O-(Geranylgeranyl)glycerol1-phosphate | 6.77E-07 | 2.2366 |
| N-(7Z-tetradecenoyl)-homoserine lactone | 1.44E-07 | 2.2203 |
| 17-phenyl heptadecanoic acid | 4.28E-09 | 2.2193 |
| Aspergillusether E | 6.91E-05 | 2.2095 |
| PON-PE | 8.82E-09 | 2.1987 |
| GD2(d18:1/26:1(17Z)) | 6.30E-09 | 2.1979 |
| PC(O-16:0/18:2(9Z,12Z)) | 4.65E-09 | 2.1762 |
| TG(17:2(9Z,12Z)/22:5(7Z,10Z,13Z,16Z,19Z)/22:5(7Z,10Z,13Z,16Z,19Z))[iso3] | 1.93E-09 | 2.1552 |

**Supplementary Tabe 7: Bacterial peptides bound to SAH Non-survivors HNA1**

| Bacteria | Sequence | Pval | FC |
| --- | --- | --- | --- |
| Escherichia coli | FEEKNTCGR | 1.68E-21 | 7.4616 |
| Neisseria meningitidis C | AFAEPFYK | 2.24E-21 | 6.8794 |
| Metamycoplasma hominis | KLATGSNCILLDVK | 1.75E-21 | 6.8676 |
| Clostridium botulinum | AEYLVQFAMMGK | 2.71E-21 | 6.8204 |
| Bacillus cereus | HRSLGIK | 3.46E-21 | 6.2978 |
| Listeria monocytogenes 4b | TCLTIDELTTEMAPYLAK | 2.59E-19 | 6.1098 |
| Clostridium perfringens | SAEDEDQFTR | 1.73E-20 | 5.9052 |
| Klebsiella pneumoniae | WREGQYCDGANNR | 4.85E-21 | 5.5845 |
| Bacillus anthracis | GKFFGCSNHPNCNK | 2.22E-18 | 5.5248 |
| Corynebacterium kroppenstedtii | EHDAILLGAVGDPR | 1.29E-18 | 5.438 |
| Salmonella typhi | THLFIKGNGIVDLPK | 5.46E-21 | 5.3023 |
| Brucella abortus | QHVPYLVR | 9.60E-18 | 5.1003 |
| Streptococcus pneumoniae 4 | KELFFAGSLER | 7.50E-20 | 4.9911 |
| Ehrlichia chaffeensis | KPVIPGDTLILTVNVVHK | 1.07E-20 | 4.9679 |
| Legionella pneumophila | HTPPCINGR | 3.14E-14 | 4.959 |
| Vibrio cholerae O1 | NSNNGGNR | 1.93E-15 | 4.8378 |
| Streptococcus pyogenes M1 | MAMANHR | 4.83E-13 | 4.6998 |
| Clostridium botulinum | QLISKELIK | 5.76E-19 | 4.6429 |
| Pseudomonas aeruginosa | FCTEDGK | 5.80E-13 | 4.5912 |
| Tannerella forsythia | IVAICDIQKGPLEK | 6.28E-17 | 4.3379 |
| Bacillus phage SPbeta | VSIPGFGTFEVR | 1.30E-21 | 12.69 |
| Pseudotsuga menziesii | ELLSEINR | 1.31E-21 | 11.441 |
| Scyliorhinus stellaris | LILQIDNAR | 1.31E-21 | 11.156 |
| Thermomonospora curvata | GIDSMATYR | 1.43E-21 | 8.5359 |
| Taphozous georgianus | VLSPADKTNVK | 1.40E-21 | 8.1852 |
| Phenylobacterium zucineum | THDLVLALASRDGGTGLLAVR | 2.84E-21 | 7.7779 |
| Roseiflexus castenholzii | VNVAEGALK | 2.12E-21 | 7.2924 |
| Synechococcus sp. | HGVDHDLADLLS | 1.88E-21 | 7.2848 |
| Mediterraneibacter gnavus | IQGKKPVR | 1.90E-21 | 7.0479 |
| Bacillus pumilus | DLYIEEMRIEK | 4.18E-19 | 6.8077 |
| Oenococcus oeni | DDDPCVICSDESR | 1.12E-20 | 6.3395 |
| Ruegeria pomeroyi | YCDRVVGMR | 2.08E-20 | 6.2974 |
| Francisella tularensis tularensis | TGTCPEDCK | 2.54E-21 | 6.1432 |
| Rickettsia felis | FLSLIIVILILYNIVK | 2.33E-17 | 6.1207 |
| Endomicrobium trichonymphae | IYDGQTVEIR | 7.22E-16 | 5.9871 |
| Neurospora crassa | DEVAEAAALGLR | 4.77E-15 | 5.8997 |
| Neorickettsia sennetsu | IHIVGDDIFVTNPK | 2.08E-21 | 5.7423 |
| Blautia hydrogenotrophica | IGQATGKIAQALGMK | 2.97E-21 | 5.6751 |
| Aspergillus oryzae | VGEEETPALVHDLNTAMR | 2.92E-17 | 5.5918 |
| Lactiplantibacillus plantarum | IGGQMIALK | 3.89E-15 | 5.5409 |
| Delftia acidovorans | ASGCQAK | 8.37E-18 | 5.5405 |
| Pseudoalteromonas translucida | FVETTDEEVEFK | 2.70E-20 | 5.5308 |
| Hydrogenobaculum sp. | SGFILSKQEFAK | 5.01E-20 | 5.4295 |
| Aquifex pyrophilus | GIPMATPAFEGADEK | 7.61E-14 | 5.4052 |
| Actinoplanes sp. | AVNLVGPDGR | 2.16E-15 | 5.3642 |
| Sulfurihydrogenibium sp. | FVSVFDGFEDIK | 4.78E-20 | 5.338 |
| Protochlamydia amoebophila | LPHCSCK | 3.84E-20 | 5.2889 |
| Streptomyces lividans | AVDSTVRGFEDVVK | 2.89E-13 | 5.2674 |
| Rhizorhabdus wittichii | ITRLLEGAAPR | 8.96E-19 | 5.0832 |
| Ralstonia solanacearum | DSSLGAHIR | 1.28E-20 | 4.9844 |
| Synechococcus sp. | KHGSDGLR | 3.17E-12 | 4.8424 |
| Streptococcus uberis | HVGAKASR | 8.19E-13 | 4.8395 |
| Synechococcus sp. | IGTSILR | 3.93E-21 | 4.776 |
| Oleidesulfovibrio alaskensis | MAKVHIAVK | 1.02E-18 | 4.747 |
| Alkaliphilus oremlandii | KMQGTGNDFIVVK | 1.02E-18 | 4.7387 |
| Amoebophilus asiaticus | FVPKGGPDGGDGGK | 1.36E-14 | 4.731 |
| Methylococcus capsulatus | APVVAITGANGK | 2.00E-13 | 4.7274 |
| Thermotoga sp. | TLKELIVK | 1.18E-14 | 4.6996 |
| Spermophilus citellus | IGGHGAEYGAEALER | 1.27E-13 | 4.6737 |
| Lactobacillus delbrueckii | MDDASAR | 3.42E-19 | 4.5835 |
| Chlamydia caviae | GRELAYPEHGHR | 2.69E-17 | 4.5804 |
| Mycobacterium marinum | MAYSHSGYPGGLR | 3.84E-18 | 4.5247 |
| Bacillus subtilis | DEEAIGK | 7.90E-19 | 4.5082 |
| Erythrobacter litoralis | FDSYSPR | 6.71E-13 | 4.3693 |
| Streptococcus pneumoniae | DIDISRAER | 5.06E-10 | 4.354 |
| Lactococcus lactis cremoris | QNAFCRMFGKPNEAK | 7.93E-16 | 4.3329 |
| Bifidobacterium longum | QNKTMNDMTYR | 1.05E-18 | 4.2579 |
| Thermus thermophilus | KTDAMGEDGNFHGK | 1.30E-10 | 4.2296 |
| Rarobacter faecitabidus | KAGATPK | 5.52E-10 | 4.2225 |
| Campylobacter jejuni | FTQNNYEVSER | 6.78E-21 | 4.2217 |
| Shewanella sp. | IHPGIVVELLPMSTK | 9.25E-13 | 4.2039 |
| Prochlorococcus marinus | SLVDDIEFSCEDASR | 2.12E-11 | 4.1375 |
| Exiguobacterium sp. | EALRKPK | 4.17E-16 | 4.1199 |
| Dehalococcoides mccartyi | FCPDGLK | 4.84E-15 | 4.106 |
| Saimiri boliviensis boliviensis | LQAEAFQAR | 6.86E-13 | 4.093 |
| Latilactobacillus sakei sakei | ADTMFGVSYIVMAPEHK | 5.30E-10 | 4.0845 |
| Mus musculus | WAWAPSFPACK | 6.98E-21 | 4.0312 |
| Otolemur crassicaudatus | VNIEEAGGEALGR | 1.39E-11 | 4.0219 |
| Synechocystis sp. | VYEQLTAEAK | 1.72E-15 | 3.9816 |
| Bifidobacterium bifidum | TVYVGCR | 8.07E-19 | 3.9656 |
| Pseudomonas aeruginosa | LLGLPVVLVVGVR | 3.79E-10 | 3.9039 |
| Spiroplasma apis | AIAHEIGNTK | 1.02E-15 | 3.8945 |
| Shouchella clausii | EAADEAEQYFK | 2.97E-16 | 3.865 |
| Salmonella paratyphi C | LTAGEIK | 6.64E-12 | 3.8531 |
| Bacillus velezensis | KSLELIDEK | 2.31E-13 | 3.8523 |
| Desulfitobacterium hafniense | KLAQGEQEGEGK | 4.31E-16 | 3.8346 |
| Streptococcus pneumoniae | EYYLDLR | 1.94E-08 | 3.8209 |
| Cereibacter sphaeroides | VAHAIGQFKR | 4.62E-10 | 3.8192 |
| Mycoplasmopsis synoviae | EEGYISSYSVEGSK | 5.59E-16 | 3.818 |
| Buchnera aphidicola | IIKLSLLK | 6.75E-11 | 3.8178 |
| Lawsonia intracellularis | FDDAEMFK | 1.39E-15 | 3.8048 |
| Geodermatophilus obscurus | SEYSAGR | 1.54E-16 | 3.7176 |
| Bradyrhizobium sp. | EAPAAVEAR | 6.58E-12 | 3.711 |
| Prochlorococcus marinus | ESQAGTGLR | 3.54E-15 | 3.6871 |
| Nitrobacter vulgaris | AYIDECLAGADGPCGK | 4.15E-10 | 3.6777 |
| Erwinia tasmaniensis | VVAYQIDAEGK | 5.04E-14 | 3.6637 |
| Geobacillus sp. | QKGGQLK | 7.18E-10 | 3.6476 |
| Lactobacillus leichmannii | FDFYEGAVY | 1.68E-08 | 3.6447 |
| Clavibacter michiganensis | SDIPDFR | 2.07E-09 | 3.6336 |
| Frankia casuarinae | AGNVIIVRYEGPR | 1.11E-12 | 3.6318 |
| Acaryochloris marina | YDGVSIFCGIGER | 3.67E-13 | 3.6182 |
| Trichormus variabilis | AAAALVK | 1.42E-10 | 3.5469 |
| Sinorhizobium medicae | RHALAAAQIR | 4.57E-14 | 3.5459 |
| Lactococcus lactis cremoris | QGNNTER | 3.34E-18 | 3.5392 |
| Leptothrix cholodnii | FITSGPHTGQR | 1.61E-07 | 3.5374 |
| Pseudarthrobacter chlorophenolicus | GLPSAVVNGSAADAEAVWR | 7.39E-08 | 3.509 |
| Flavobacterium johnsoniae | VVVCGYGDVGK | 5.78E-09 | 3.4517 |
| Streptomyces hygroscopicus | THEANVSSLMLNCDR | 1.19E-15 | 3.4251 |
| Lactobacillus gasseri | AFDALYDEDK | 4.26E-10 | 3.408 |
| Cytophaga hutchinsonii | FVDEGQLRLQLEAK | 1.05E-10 | 3.3932 |
| Xenorhabdus nematophila | AHGVETGK | 1.11E-08 | 3.3788 |
| Vibrio vulnificus | ECMGFSGNSEGGFMAR | 7.38E-07 | 3.3723 |
| Mycolicibacterium chitae | HAGAAGK | 3.76E-09 | 3.3208 |
| Staphylococcus aureus | NEWAFETSDK | 1.31E-09 | 3.2782 |
| Limnospira fusiformis | AGLXAAK | 3.39E-08 | 3.2138 |
| Rhizobium meliloti | QVAFYGKGGIGNSK | 2.96E-16 | 3.192 |
| Levilactobacillus brevis | FVKQTLPPFFAR | 1.02E-10 | 3.1837 |
| Sorangium cellulosum | KYAALGDVIVVSIK | 1.96E-06 | 3.1802 |
| Bifidobacterium longum | RNPLGGR | 2.35E-10 | 3.1632 |
| Campylobacter jejuni | LDGYEKLIPEYQTPK | 9.02E-17 | 3.127 |
| Nitrosospira multiformis | DPALAVK | 1.23E-07 | 3.072 |
| Frankia sp. | TIPTPIR | 4.22E-14 | 3.0631 |
| Yersinia entomophaga | LDGGGSKEEER | 4.96E-13 | 3.0301 |
| Streptomyces antibioticus | KALVLAGGSGTR | 4.05E-06 | 3.0259 |
| Staphylococcus aureus | GQQSGEDDLNAMK | 2.38E-11 | 2.9436 |
| Pseudomonas aeruginosa | EVNEAVAR | 2.41E-06 | 2.9275 |
| Bacillus licheniformis | VPFKDIFSKPTIK | 1.88E-09 | 2.9048 |
| Methylobacterium sp. | LPDAADK | 2.47E-08 | 2.9047 |
| Solidesulfovibrio fructosivorans | CGACYDKCK | 6.92E-06 | 2.8535 |
| Xylella fastidiosa | GPIGAAK | 1.10E-06 | 2.8375 |
| Xanthomonas euvesicatoria | EHGGDDR | 1.82E-07 | 2.8325 |
| Azotobacter vinelandii | LAENGVR | 2.60E-13 | 2.8123 |
| Cupriavidus taiwanensis | TMDPYANR | 4.01E-07 | 2.8031 |
| Caldicellulosiruptor saccharolyticus | GYLDAAGVCYK | 3.84E-11 | 2.798 |
| Treponema pallidum pallidum | VSTSANCDTFR | 4.62E-13 | 2.789 |
| Nasua nasua | FFESFGDLSSPDAIMGNPK | 2.33E-05 | 2.785 |
| Mycoplasma mycoides | QDLLISLINK | 1.21E-07 | 2.7785 |
| Geobacter metallireducens | ESVQAALSYIR | 7.74E-07 | 2.7358 |
| Moorella thermoacetica | YSGALGANYTDAR | 1.94E-15 | 2.6866 |
| Burkholderia pseudomallei | CDFPGGDAR | 1.34E-05 | 2.6584 |
| Listeria monocytogenes 4a | KYDLEVWIPSYNSYR | 0.000128 | 2.6571 |
| Streptomyces viridosporus | SRIPDYAK | 7.32E-10 | 2.6244 |
| Chlorocebus aethiops | TGYYFDGISR | 9.83E-06 | 2.5884 |
| Prochlorococcus marinus | SSGVDLCIDDFER | 8.12E-10 | 2.5868 |
| Streptomyces netropsis | AVDGDFK | 3.86E-06 | 2.5841 |
| Megalodesulfovibrio gigas | KHATLVGAGFPFIK | 2.68E-12 | 2.5558 |
| Burkholderia pseudomallei | DAALDAADKAYK | 8.13E-06 | 2.5203 |
| Segniliparus rotundus | NGLVPVR | 1.10E-05 | 2.5107 |
| Salinibacter ruber | TGNGKIK | 0.00017 | 2.5089 |
| Streptococcus pyogenes M12 | HETIYQAVKEK | 2.72E-11 | 2.5011 |
| Cellulomonas fimi | SGTEIEADVVGEEYAR | 1.69E-07 | 2.4682 |
| Ehrlichia canis | SGVAVIRVSGK | 2.55E-06 | 2.421 |
| Streptococcus pneumoniae | KVGENAK | 5.75E-10 | 2.3836 |
| Paraburkholderia phytofirmans | GLLIGAAQ | 1.13E-05 | 2.3813 |
| Streptomyces albus | TSGDRGGR | 2.60E-05 | 2.3728 |
| Idiomarina loihiensis | DEESDDTPR | 2.77E-05 | 2.3711 |
| Shigella sonnei | WDEKWGYDYNGDSK | 3.49E-11 | 2.3687 |
| Polaromonas sp. | TPGIPPK | 5.73E-05 | 2.3633 |
| Acinetobacter baumannii | SAGFGLYPDSK | 8.61E-15 | 2.3613 |
| Vibrio cholerae O1 | LGVAQEAPK | 1.33E-07 | 2.3375 |
| Campylobacter hominis | METTLGDDGR | 1.78E-11 | 2.3288 |
| Treponema denticola | ELNTEEETKEAEK | 5.74E-07 | 2.3286 |
| Nostoc punctiforme | EGWEVELSDGNTSK | 2.07E-13 | 2.2809 |
| Syntrophotalea carbinolica | VLHSPLSVLK | 6.44E-12 | 2.2741 |
| Rhodococcoides fascians | LSRLQPR | 0.001334 | 2.268 |
| Clostridium botulinum | HSLDMEK | 1.61E-05 | 2.262 |
| Escherichia coli O127:H6 | KELNLALYSR | 3.42E-09 | 2.2615 |
| Albidiferax ferrireducens | SAQNILQALEKSK | 1.81E-06 | 2.247 |
| Leptospira biflexa Patoc | TDHTNASR | 0.000196 | 2.2323 |
| Agrobacterium tumefaciens | GERVDIR | 2.75E-09 | 2.2305 |
| Lactobacillus acidophilus | VIGKYLILLDAK | 0.000351 | 2.2222 |
| Staphylococcus aureus | IIIKPSIK | 7.11E-11 | 2.1729 |
| Streptococcus suis | KGGGSTH | 0.001468 | 2.1601 |
| Rhodococcus opacus | DPHALEIAGGRLAPFADR | 0.000592 | 2.154 |
| Mentha piperita | DLQEWSGEIGSDIPFFFSHGAAYCTGR | 0.000961 | 2.1086 |
| Mycolicibacterium smegmatis | ESAQIAMSYVR | 6.77E-05 | 2.0985 |
| Gloeothece citriformis | GPIPGKE | 3.49E-05 | 2.0822 |
| Rhizobium leguminosarum | NVPKFSAGK | 1.13E-06 | 2.0703 |
| Acidianus filamentous virus 1 | LNPLDHR | 2.36E-08 | 2.0686 |
| Desulfatibacillum aliphaticivorans | EIATCKPDYYR | 1.41E-06 | 2.0563 |
| Sporosarcina ureae | YSIQGLGK | 7.30E-05 | 2.0507 |
| Brucella anthropi | VPTSITCDECSGSGAK | 0.00275 | 2.0446 |
| Campylobacter fetus fetus | IITSSIKEK | 0.001496 | 1.9961 |
| Chlorobaculum tepidum | NFCSSCSK | 0.001377 | 1.9755 |
| Acidithiobacillus ferrooxidans | FGGGLGK | 4.96E-08 | 1.9742 |
| Mycobacterium tuberculosis | HLLRTGVVR | 0.002223 | 1.9722 |
| Latilactobacillus sakei | APDAEAK | 4.13E-05 | 1.9585 |
| Listeria monocytogenes 4b | ADGTTGK | 0.001947 | 1.9384 |
| Aeromonas salmonicida | EGSDNREG | 1.19E-09 | 1.9317 |
| Bos taurus | MFLSFPTTK | 0.001626 | 1.9307 |
| Staphylococcus aureus | YGIEGDLYK | 0.004441 | 1.927 |
| Frankia alni | EQYSRDPR | 1.21E-05 | 1.8738 |
| Streptomyces griseus | FLSIAEGLQR | 7.06E-05 | 1.8578 |
| Fructilactobacillus sanfranciscensis | GYGFLTTDD | 0.000111 | 1.8442 |
| Cereibacter sphaeroides | YSFDMGEEATR | 2.16E-07 | 1.8142 |
| Streptomyces exfoliatus | EHVVTEQFR | 5.06E-07 | 1.8078 |
| Ralstonia pickettii | GEGEDAK | 0.00021 | 1.8059 |
| Campylobacter jejuni | FHAQALEKGAK | 0.004926 | 1.7908 |
| Paenibacillus polymyxa | KLYVSLVK | 7.33E-05 | 1.7783 |
| Edwardsiella ictaluri | DLADGHA | 0.000968 | 1.7739 |
| Corynebacterium amycolatum | KLTEADK | 1.73E-05 | 1.7621 |
| Gemmatimonas aurantiaca | QAAASAA | 6.12E-13 | 1.7599 |
| Escherichia coli | RIPVTLDQIPPEMVK | 0.001244 | 1.7257 |
| Xanthomonas campestris | LGGGAAK | 0.001116 | 1.7135 |
| Methylobacillus glycogenes | NECCAGQGR | 7.10E-05 | 1.7074 |
| Borrelia turicatae | VATEAVKILR | 0.001796 | 1.7025 |
| Xanthomonas axonopodis | DGADPVK | 0.001456 | 1.7012 |
| Brevibacillus parabrevis | SDDQVSIR | 0.000134 | 1.6862 |
| Salmonella enteritidis | MTEIAQK | 2.64E-09 | 1.685 |
| Rhizobium meliloti | HLIPGSK | 0.000437 | 1.6846 |
| Clostridium acetobutylicum | FTDGKIYR | 0.000509 | 1.6721 |
| Caldicellulosiruptor bescii | IPELPDQKK | 1.25E-12 | 1.6678 |
| Salmonella paratyphi B | YCPGDKALR | 3.55E-12 | 1.6478 |
| Rattus norvegicus | ATQGEQDNYEMHVR | 0.000441 | 1.6267 |
| Listeria welshimeri 6b | LFGPAKAILK | 0.022565 | 1.6201 |
| Neisseria meningitidis C | DPAKPGK | 0.00024 | 1.5991 |
| Priestia megaterium | VEPAPCGD | 0.00232 | 1.5858 |
| Streptantibioticus cattleyicolor | LGLKALAIYR | 0.006304 | 1.5835 |
| Thermotoga neapolitana | ESPSTYR | 4.98E-05 | 1.5806 |
| Lentzea aerocolonigenes | HEVAARVSWSGAGVHLK | 0.009243 | 1.5746 |
| Mesomycoplasma conjunctivae | GEFTIILKLK | 0.001123 | 1.5729 |
| Pseudomonas syringae | HEMPMLSLGNAFEENDMLEFDR | 7.88E-06 | 1.5715 |
| Corynebacterium glutamicum | SAITFSETLAK | 3.20E-06 | 1.5586 |
| Azotobacter vinelandii | FCFEAVTR | 0.000332 | 1.5543 |
| Streptomyces griseus griseus | AGLPAQGR | 0.001052 | 1.5393 |
| Chlamydia muridarum | VAASGVK | 0.000859 | 1.5326 |
| Corynebacterium ammoniagenes | TAMSAGWEVR | 0.024978 | 1.5234 |
| Sphingopyxis alaskensis | DEGEDAAEGGDEA | 0.060867 | 1.5156 |

**Supplementary Tabe 8: Metabolites bound to SAH Non-survivors HNA1**

| Compound | Label | Pval | FC |
| --- | --- | --- | --- |
| 13-HDoHE | HMDB60043 | 2.30E-19 | 6.2197 |
| Elaidic carnitine | HMDB06464 | 2.00E-20 | 5.9002 |
| PC(32:1) | HMDB07872 | 4.08E-20 | 5.626 |
| 11-cis-Retinol | C00899 | 3.36E-18 | 5.4027 |
| Retinyl palmitate | C02588 | 2.60E-18 | 5.1805 |
| Oleamide | C19670 | 1.40E-16 | 4.7329 |
| Urea | HMDB0000294 | 7.88E-20 | 4.6366 |
| Anandamide | C11695 | 1.78E-17 | 4.4669 |
| Heptanoylcarnitine | HMDB13238 | 1.57E-17 | 4.3154 |
| Cyclic pyranopterin monophosphate | HMDB59639 | 1.18E-15 | 4.1864 |
| trans-2-Dodecenoylcarnitine | HMDB13326 | 2.47E-14 | 3.8484 |
| Sphinganine 1-phosphate | C01120 | 1.24E-15 | 3.7759 |
| Histidine | C00135 | 1.32E-15 | 3.7727 |
| 20-Hydroxyeicosatetraenoic acid | C14748 | 1.05E-13 | 3.5322 |
| N-Myristoyl Lysine | HMDB0242055 | 3.72E-17 | 3.3553 |
| Gamma-glutamyl-L-putrescine | C15699 | 3.95E-08 | 3.3099 |
| N-Acetyl-D-glucosaminate | C01133 | 5.84E-11 | 3.2784 |
| Cholic acid | C00695 | 2.44E-14 | 3.0459 |
| Leukotriene C4 | C02166 | 2.94E-13 | 2.9961 |
| Chenodeoxyglycocholic acid | C05462 | 3.00E-09 | 2.9386 |
| 3-Oxododecanoic acid | HMDB0010727 | 3.71E-08 | 2.5606 |
| PC(P-16:0/14:1(9Z)) | HMDB11204 | 1.55E-09 | 2.5427 |
| Tetradecanoylcarnitine | HMDB0005066 | 5.51E-06 | 2.4594 |
| Porphyrin | C05113 | 2.41E-09 | 2.4307 |
| 2-Propylglutaric acid | C16658 | 0.001046 | 2.0288 |
| alpha-Zearalenol | C14750 | 1.58E-18 | 5.6724 |
| Palmitoyl Serinol | HMDB13654 | 5.68E-17 | 5.1098 |
| Rhizocticin A | C17944 | 6.14E-15 | 4.3871 |
| Inosine | C00294 | 4.39E-12 | 3.8 |
| PE(P-16:0/14:1(9Z)) | HMDB11336 | 6.50E-13 | 3.501 |
| Lysylleucine | HMDB28955 | 1.17E-08 | 3.1517 |
| N-Acetyl-L-tyrosine | C01657 | 1.47E-12 | 2.9233 |
| N-Docosahexaenoyl GABA | HMDB0062332 | 8.54E-07 | 2.9127 |
| N2,N2-Dimethylguanosine | HMDB04824 | 4.41E-16 | 2.7695 |
| N-Acetyl-L-2-amino-6-oxopimelate | C05539 | 2.78E-12 | 2.7338 |
| 2,3,4,5-Tetrahydro-2-pyridinecarboxylic acid | C00450 | 8.22E-05 | 2.716 |
| Dehydrocholic acid | C13154 | 5.87E-09 | 2.5091 |
| Decylubiquinone | C15494 | 1.90E-09 | 2.4774 |
| Acetyl citrate | HMDB0059808 | 1.42E-08 | 2.4295 |
| 20-Carboxy-leukotriene B4 | C05950 | 2.87E-07 | 2.3987 |
| (R)-2,3-Dihydroxy-3-methylvalerate | C06007 | 5.78E-12 | 2.271 |
| 4-Hydroxyphenylacetylglutamic acid | C05595 | 6.78E-09 | 2.2662 |
| Allocholic acid | C17737 | 1.62E-05 | 2.1353 |
| 2-Octenoylcarnitine | HMDB0013324 | 1.08E-08 | 2.1237 |
| L-prolyl-L-leucine | HMDB0253028 | 0.000258 | 2.0937 |
| 3-Hydroxy-cis-5-octenoylcarnitine | HMDB0240766 | 1.70E-07 | 2.0773 |
| 2-Methylguanosine | HMDB0005862 | 2.22E-05 | 1.9951 |
| L-Pyridosine | HMDB0029443 | 6.00E-07 | 1.9499 |
| 3a-Hydroxy-5b-pregnane-20-one | C05480 | 1.84E-07 | 1.9449 |
| Mycobactin S | C12216 | 3.64E-12 | 1.9359 |
| 5-(2-Hydroxyethyl)-4-methylthiazole | HMDB32985 | 3.39E-08 | 1.9295 |
| DL-Homocystine | C01817 | 6.30E-07 | 1.9172 |
| 2-Methyl-1-hydroxybutyl-ThPP | HMDB12310 | 0.000589 | 1.9037 |
| Prostaglandin G2 | C05956 | 3.06E-19 | 1.8979 |
| Docosanamide | HMDB00583 | 1.08E-06 | 1.8944 |
| 11beta-Hydroxyprogesterone | C05498 | 1.60E-08 | 1.8929 |
| 2,7-Anhydro-alpha-N-acetylneuraminic acid | C04521 | 4.46E-05 | 1.8783 |
| 13,14-Dihydro-15-keto-PGD2 | HMDB0060042 | 3.55E-09 | 1.8449 |
| Asparaginyl-Phenylalanine | HMDB28738 | 0.000135 | 1.8427 |
| Dipalmitoylphosphatidylglycerol | HMDB0251613 | 0.000339 | 1.8258 |
| Sedoheptulose | HMDB03219 | 0.001424 | 1.8231 |
| Platelet-activating factor | HMDB0062195 | 6.91E-07 | 1.8093 |
| 2-Phosphoglyceric acid | HMDB0000362 | 0.000645 | 1.8021 |
| Cervonyl carnitine | HMDB06510 | 2.22E-06 | 1.8002 |
| Ubiquinone-1 | C00399 | 4.74E-05 | 1.7987 |
| Benzoylcarnitine | HMDB0240664 | 4.51E-05 | 1.7852 |
| PG(18:2(9Z,12Z)/22:6(4Z,7Z,10Z,13Z,16Z,19Z)) | HMDB10659 | 1.29E-08 | 1.7739 |
| 2-Keto-L-gluconate | HMDB11732 | 2.92E-07 | 1.7671 |
| N-Oleoyl phenylalanine | HMDB0062336 | 0.000494 | 1.764 |
| 2-Keto-glutaramic acid | HMDB01552 | 3.50E-06 | 1.7634 |
| Dehydroepiandrosterone sulfate | C04555 | 0.000848 | 1.759 |
| omega-COOH-tetranor-LTE3 | C11182 | 1.14E-05 | 1.7111 |
| L-Histidinol | C00860 | 3.55E-07 | 1.6977 |
| 3-Methoxy-4-hydroxyphenylglycol glucuronide | C03033 | 0.000562 | 1.677 |
| 2-Oxosuberate | C16589 | 0.001113 | 1.6705 |
| 1-Methylnicotinamide | C02918 | 5.89E-06 | 1.6668 |
| 2-Phenylethanol glucuronide | HMDB0010350 | 0.009119 | 1.6584 |
| Shikimic acid | C00493 | 0.000332 | 1.6299 |
| Protoporphyrinogen IX | C01079 | 0.000128 | 1.6202 |
| 6,9,12,15,18,21-Tetracosahexaenoic acid | HMDB0013025 | 0.000104 | 1.6194 |
| Histidylphenylalanine | HMDB0028892 | 0.01011 | 1.6177 |
| Pyridoxamine 5'-phosphate | C00647 | 0.000184 | 1.589 |
| Glycerol 1,2-cyclic phosphate | C03947 | 9.02E-05 | 1.5817 |
| Vitamin K1 | HMDB15157 | 0.000336 | 1.5798 |
| gamma-Glutamylglutamic acid | C05282 | 6.70E-06 | 1.5713 |
| Acetyl-N-formyl-5-methoxykynurenamine | HMDB04259 | 0.003355 | 1.5557 |
| DHAP(8:0) | HMDB11685 | 0.009788 | 1.5506 |
| D-Asparagine | C01905 | 2.32E-08 | 1.5423 |
| 2-Hexaprenyl-3-methyl-5-hydroxy-6-methoxy-1,4-benzoquinone | C05805 | 3.75E-06 | 1.5172 |
| Aspartyl-L-proline | HMDB02335 | 2.03E-10 | 1.5095 |
| 3-Hydroxytetradecanedioic acid | HMDB0000394 | 0.000359 | 1.5045 |
| Tyramine | HMDB00306 | 0.00036 | 1.5038 |
| Biotin | C00120 | 5.34E-05 | 1.4935 |
| AICAR | C04677 | 0.013246 | 1.4916 |

**Supplementary Tabe 9: Proteins bound to SAH Non-survivors HNA1**

|  | Pval | FC |
| --- | --- | --- |
| MSANTD4 | 1.30666E-21 | 11.471 |
| BECN2 | 1.32706E-21 | 10.329 |
| RNF157 | 1.45466E-21 | 10.118 |
| CD82 | 1.34771E-21 | 9.9554 |
| PYCR3 | 1.35982E-21 | 9.6614 |
| OR8D4 | 1.3985E-21 | 9.3203 |
| OR6B3 | 2.2441E-21 | 9.1575 |
| LARP7 | 3.22686E-21 | 9.0964 |
| FOXS1 | 1.6116E-21 | 8.9371 |
| OTUB1 | 1.95893E-21 | 8.7623 |
| DERA | 5.79656E-21 | 8.6224 |
| HCRTR1 | 1.59909E-21 | 8.2894 |
| PAPOLG | 4.19745E-21 | 8.0787 |
| MAP4K1 | 1.98756E-21 | 8.0053 |
| FOXD4 | 2.89369E-21 | 7.9574 |
| SNRPA1 | 3.31025E-20 | 7.8353 |
| DEPTOR | 2.19474E-21 | 7.8102 |
| GABRR3 | 2.40444E-21 | 7.752 |
| EXOG | 2.19613E-21 | 7.7259 |
| MAGEE1 | 2.53303E-20 | 7.5935 |
| UBA2 | 5.1442E-20 | 7.4696 |
| SLC25A38 | 8.27594E-19 | 7.3806 |
| CYP2S1 | 2.06511E-20 | 7.3365 |
| NET1 | 3.27587E-20 | 7.2554 |
| FRG2 | 3.23497E-19 | 7.2433 |
| NIBAN2 | 7.58416E-21 | 7.2218 |
| ENC1 | 2.00324E-20 | 7.1886 |
| MLKL | 4.41979E-21 | 7.1257 |
| DLG3 | 7.08203E-20 | 7.1087 |
| TACR1 | 6.32694E-20 | 7.084 |
| PPP1R36 | 6.18972E-21 | 7.0341 |
| CHMP5 | 2.9533E-18 | 6.9369 |
| CDK18 | 8.09453E-20 | 6.8611 |
| GOLGA1 | 6.15061E-21 | 6.7757 |
| IFNA1 | 1.51796E-20 | 6.7561 |
| CDH12 | 6.10681E-21 | 6.7529 |
| TMEM94 | 2.46677E-19 | 6.6206 |
| HNRNPCL4 | 1.36335E-19 | 6.6158 |
| NLGN4X | 5.19176E-17 | 6.6031 |
| NOP56 | 1.19065E-20 | 6.5533 |
| OR2L13 | 1.3816E-20 | 6.5424 |
| MOK | 5.06681E-17 | 6.5148 |
| PGS1 | 2.67546E-20 | 6.4598 |
| MPP2 | 1.0535E-19 | 6.4339 |
| ITGAX | 3.09275E-20 | 6.4194 |
| OPA3 | 1.98269E-20 | 6.3684 |
| JMJD4 | 1.41812E-20 | 6.357 |
| PSG3 | 3.96966E-20 | 6.3123 |
| MCAT | 2.08067E-18 | 6.2781 |
| SRSF7 | 8.69795E-19 | 6.1936 |
| CD48 | 7.7393E-18 | 6.1785 |
| TRAM1 | 1.84316E-19 | 6.1643 |
| CYP2A6 | 9.46057E-20 | 6.1394 |
| BPIFB2 | 6.58135E-18 | 6.1306 |
| OSBPL9 | 3.44829E-18 | 6.1201 |
| ARIH1 | 8.0952E-19 | 6.1012 |
| CAPNS2 | 5.76248E-16 | 6.0823 |
| ZNF281 | 3.07033E-18 | 6.0807 |
| DACT3 | 8.19315E-17 | 6.0359 |
| B4GALT3 | 1.66801E-19 | 5.9867 |
| CIAO3 | 7.26161E-17 | 5.9614 |
| ARL16 | 6.58526E-20 | 5.9525 |
| OR4N5 | 4.07475E-20 | 5.95 |
| LRRC2 | 1.13617E-19 | 5.9439 |
| OR1L3 | 1.27672E-18 | 5.9038 |
| BMPER | 1.00015E-17 | 5.8764 |
| GTPBP2 | 1.03078E-19 | 5.8608 |
| NUAK2 | 1.38062E-17 | 5.8444 |
| DSEL | 7.58372E-19 | 5.8423 |
| FAM216B | 1.64684E-19 | 5.8197 |
| MILR1 | 3.74845E-18 | 5.8131 |
| SLC22A11 | 6.53306E-17 | 5.8017 |
| TNNC2 | 2.98126E-19 | 5.7802 |
| SPICE1 | 1.27445E-15 | 5.7774 |
| CLRN2 | 3.72723E-19 | 5.7762 |
| SPAG9 | 1.7477E-19 | 5.6912 |
| USH1G | 9.27536E-19 | 5.6872 |
| CHDH | 6.97521E-19 | 5.6492 |
| PELO | 3.47556E-18 | 5.6392 |
| ADCY7 | 1.68227E-15 | 5.6374 |
| AMDHD2 | 1.78256E-18 | 5.6308 |
| FAM9C | 2.15166E-18 | 5.6279 |
| MED1 | 8.00675E-17 | 5.6027 |
| VKORC1 | 6.37092E-17 | 5.5881 |
| ZNF70 | 5.46068E-19 | 5.5785 |
| TENT4A | 2.16562E-19 | 5.57 |
| PHF8 | 2.49995E-18 | 5.5597 |
| CA1 | 1.81299E-15 | 5.5384 |
| BAIAP3 | 2.59331E-19 | 5.5289 |
| DNAAF4 | 2.26376E-19 | 5.5236 |
| SPOCK3 | 2.80782E-19 | 5.5142 |
| GRIN3B | 1.18377E-17 | 5.4847 |
| PACC1 | 2.14312E-16 | 5.4792 |
| SLC12A6 | 1.02958E-17 | 5.4659 |
| PLEKHB1 | 3.4806E-16 | 5.4602 |
| CFHR4 | 3.23065E-18 | 5.4295 |
| ZNF700 | 7.85829E-16 | 5.4158 |
| ASAP1 | 1.49787E-18 | 5.3685 |
| ATG16L1 | 7.43817E-14 | 5.3618 |
| TESMIN | 3.30752E-15 | 5.3602 |
| TPH2 | 1.20837E-15 | 5.3602 |
| ZSCAN5B | 7.24217E-18 | 5.3325 |
| FAM90A7 | 1.13851E-15 | 5.2978 |
| CCDC150 | 5.85039E-16 | 5.2792 |
| DUS1L | 3.20082E-13 | 5.2772 |
| GBE1 | 3.03772E-15 | 5.2519 |
| ZNF625 | 3.46618E-13 | 5.2499 |
| CASP6 | 7.7838E-17 | 5.2498 |
| CNNM4 | 7.08998E-16 | 5.1993 |
| TMCO5A | 1.55796E-18 | 5.1788 |
| CACNG1 | 1.82592E-12 | 5.1761 |
| TAS2R9 | 4.46036E-18 | 5.1409 |
| AKAP11 | 1.93621E-17 | 5.1391 |
| CCNG2 | 4.72318E-15 | 5.1257 |
| MRPS7 | 2.95408E-17 | 5.1082 |
| SNX9 | 3.81148E-14 | 5.0858 |
| CNDP2 | 2.37785E-12 | 5.0805 |
| GBP1 | 4.41082E-13 | 5.0671 |
| GOLGA6L6 | 5.05342E-16 | 5.0648 |
| PON3 | 1.29938E-16 | 5.0635 |
| POC5 | 1.07792E-13 | 5.0448 |

**Supplementary Tabe 10: Lipids bound to SAH Non-survivors HNA2**

| Name | Pval | FC |
| --- | --- | --- |
| 4'-Apo-3,4-didehydrolycopene/ (4-Apo-3',4'-didehydrolycopene) | 7.64E-18 | 6.0165 |
| PE(P-16:0/15:1(9Z)) | 9.86E-18 | 5.4014 |
| 3-heptadecylphenol | 6.29E-19 | 5.0908 |
| 4,7,10,13-docosatetraenoic acid | 8.52E-16 | 4.5208 |
| PC(12:0/18:1(9Z)) | 1.24E-15 | 4.5002 |
| PE(16:1(9Z)/20:5(5Z,8Z,11Z,14Z,17Z)) | 4.34E-14 | 4.3783 |
| 1-Octadecylglycerol | 7.09E-08 | 3.6824 |
| PA(20:1(11Z)/0:0) | 3.40E-13 | 3.5869 |
| 2' 4'-Dihydroxyacetophenone | 9.11E-21 | 3.4294 |
| PS(O-20:0/14:1(9Z)) | 9.19E-15 | 3.2942 |
| (E,E)-3,7,11-Trimethyl-2,6,10-dodecatrienyl decanoate | 4.38E-13 | 3.1711 |
| DG(18:4(6Z,9Z,12Z,15Z)/20:5(5Z,8Z,11Z,14Z,17Z)/0:0)[iso2] | 4.98E-08 | 3.1195 |
| PA(22:0/22:4(7Z,10Z,13Z,16Z)) | 1.74E-09 | 2.9249 |
| N-(6-Aminohexanoyl)-6-aminohexanoate | 2.88E-10 | 2.7435 |
| PS(O-16:0/21:0) | 6.52E-13 | 2.7174 |
| 2-Decene-4,6-diynoic acid, methyl ester, (E)- | 3.51E-09 | 2.582 |
| Palmitoyl-EA(d4) | 6.18E-06 | 2.5129 |
| PG(12:0/19:0) | 2.06E-06 | 2.4079 |
| PG(16:1(9Z)/22:2(13Z,16Z)) | 1.97E-09 | 2.3066 |
| [FAamino oxo(6:0/2:0)]2-amino-3-oxo-hexanedioicacid | 0.000137 | 2.2572 |
| PG(O-16:0/15:1(9Z)) | 0.000234 | 2.1548 |
| DG(13:0/20:5(5Z,8Z,11Z,14Z,17Z)/0:0)[iso2] | 2.46E-10 | 2.1129 |
| MGMG(18:2(9Z,12Z)/0:0) | 8.98E-08 | 2.0496 |
| PC(12:0/17:2(9Z,12Z)) | 2.52E-07 | 2.011 |
| 20-HETE-d6 | 2.66E-06 | 2.0035 |
| 19'-Hydroxyfucoxanthin (19'-butanoate) | 7.74E-11 | 1.9904 |
| PIM3(16:0/18:0) | 1.03E-09 | 1.9324 |
| GD2(d18:1/26:1(17Z)) | 5.95E-07 | 1.9181 |
| Cer(d18:1/29:0(29OH)) | 3.51E-10 | 1.9008 |
| PG(16:1(9Z)/22:4(7Z,10Z,13Z,16Z)) | 7.91E-06 | 1.8809 |
| PS(22:6(4Z,7Z,10Z,13Z,16Z,19Z)/0:0) | 7.75E-08 | 1.8553 |
| GlcCer(t18:1(8Z)/16:0(2OH[S])) | 9.48E-07 | 1.8325 |
| sn-3-O-(Geranylgeranyl)glycerol1-phosphate | 5.28E-05 | 1.8284 |
| 3β-hydroxy-12β-acetoxyganodernoid D | 1.31E-08 | 1.8182 |
| Cer(m18:1(4E)/24:0) | 0.000916 | 1.8008 |
| 1-(2-methoxy-17Z-tetracosenyl)-sn-glycero-3-phosphoserine | 4.26E-07 | 1.7796 |
| PS(O-16:0/15:0) | 4.08E-05 | 1.7616 |
| PC(O-16:1(11Z)/0:0) | 0.000879 | 1.7439 |
| PG(O-16:0/13:0) | 1.76E-07 | 1.7335 |
| PI-Cer(d18:0/20:0) | 2.73E-08 | 1.7105 |
| PIM2(18:0/18:1(9Z)) | 8.24E-11 | 1.6964 |
| 9Z,11E,13-Tetradecatrienal | 0.002621 | 1.6085 |
| LeukotrieneC4 | 5.93E-12 | 1.5876 |
| 3-Buten-2-one | 9.79E-05 | 1.5782 |
| 2-Methyl-6-oxohepta-2 4-dienal | 9.68E-05 | 1.5682 |
| (2E)-octenoylcarnitine | 0.000233 | 1.5679 |
| lipoamide | 1.09E-06 | 1.5577 |
| all-trans-Retinoyl-beta-glucuronide | 4.71E-06 | 1.5439 |
| O-(11-carboxyundecanoyl)carnitine | 7.77E-05 | 1.5048 |
| 1-(2-methoxy-octadecanyl)-sn-glycero-3-phosphoethanolamine | 1.03E-05 | 1.4967 |
| TG(14:1(9Z)/14:1(9Z)/15:1(9Z))[iso3] | 0.001184 | 1.4542 |

**Supplementary Tabe 11: Bacterial peptides bound to SAH Non-survivors HNA2**

| bacteria | Sequence | Pval | FC |
| --- | --- | --- | --- |
| Vesicomyosocius okutanii | TNTGTTSMFGYQMR | 1.34E-21 | 9.1783 |
| Maridesulfovibrio salexigens | CFTDKCSYER | 9.36E-20 | 6.7727 |
| Campylobacter concisus | NANKAELTYCDGEK | 1.98E-21 | 6.7322 |
| Vibrio vulnificus | ECMGFSGNSEGGFMAR | 2.28E-21 | 5.4996 |
| Borreliella afzelii | VTVTVDK | 4.15E-19 | 4.9539 |
| Leuconostoc citreum | KHMVDLIK | 1.97E-19 | 4.8117 |
| Anaeromyxobacter dehalogenans | EALAAAGEPR | 2.32E-16 | 4.4462 |
| Wolbachia pipientis | HSTSYHHEPSYR | 6.47E-11 | 4.2507 |
| Chlorocebus aethiops | TGYYFDGISR | 4.83E-13 | 4.0983 |
| Acaryochloris marina | YDGVSIFCGIGER | 6.12E-16 | 4.0521 |
| Borrelia duttonii | FCITGSFDEYPR | 4.61E-19 | 3.9846 |
| Gemmatimonas aurantiaca | QAAASAA | 8.84E-15 | 3.9369 |
| Magnetococcus marinus | AAAAILK | 2.60E-11 | 3.9342 |
| Stenotrophomonas maltophilia | GAVAPPL | 3.96E-16 | 3.8789 |
| Spermophilus citellus | IGGHGAEYGAEALER | 2.67E-10 | 3.7672 |
| Mycoplasmopsis pulmonis | CSGDGSIK | 1.09E-20 | 3.7631 |
| Pseudomonas aeruginosa | IGQQLHA | 3.55E-11 | 3.6223 |
| Mycolicibacterium smegmatis | FANQLYLLGK | 2.80E-14 | 3.3027 |
| Mycobacteroides abscessus | VDLVFGANSELR | 5.79E-09 | 3.29 |
| Bacillus sp. | VVILSQKLK | 3.10E-12 | 3.2862 |
| Neisseria meningitidis A | DPSAFFR | 3.60E-16 | 3.062 |
| Vibrio parahaemolyticus | DDLLGMAK | 7.14E-08 | 2.977 |
| Ehrlichia canis | SGVAVIRVSGK | 1.68E-05 | 2.9335 |
| Microchaete diplosiphon | APLTEASR | 2.59E-05 | 2.7459 |
| Rhodopirellula baltica | NNDASAK | 1.37E-07 | 2.7409 |
| Lactobacillus leichmannii | FDFYEGAVY | 6.03E-05 | 2.7323 |
| Clostridium perfringens | ESLLITK | 2.12E-09 | 2.7243 |
| Streptococcus pneumoniae | DIDISRAER | 5.40E-05 | 2.5 |
| Pelobacter propionicus | GYVTTIKSAK | 1.09E-05 | 2.4905 |
| Streptococcus pneumoniae | EYYLDLR | 2.10E-06 | 2.4407 |
| Staphylococcus aureus | YGIEGDLYK | 0.000165662 | 2.4373 |
| Dictyoglomus turgidum | ISYGSKIK | 0.000352083 | 2.4327 |
| Clostridium botulinum | QLISKELIK | 8.99E-09 | 2.415 |
| Rhizobium leguminosarum | NVPKFSAGK | 3.26E-11 | 2.4114 |
| Serratia sp. | RENFSLGR | 6.16E-11 | 2.321 |
| Anaplasma marginale | CGEESYDYLPAASHIQNR | 1.16E-11 | 2.2986 |
| Prochlorococcus marinus | SLVDDIEFSCEDASR | 0.000654667 | 2.2978 |
| Francisella tularensis novicida | SKGSSTK | 1.69E-06 | 2.2919 |
| Nautilia profundicola | LLNNNPEK | 7.37E-06 | 2.2802 |
| Thermoclostridium stercorarium | FTGDFSYFMK | 1.75E-14 | 2.2327 |
| Salmonella paratyphi C | LTAGEIK | 0.001981961 | 2.1981 |
| Porphyromonas gingivalis | AGKASPK | 1.44E-12 | 2.1895 |
| Streptococcus pyogenes M6 | NGYAISTQVSSGK | 1.14E-05 | 2.1829 |
| Bifidobacterium animalis lactis | AEWKFSDVEMR | 0.002041791 | 2.1816 |
| Xenorhabdus nematophila | ADENGTEEEGK | 0.00171831 | 2.177 |
| Flavobacterium psychrophilum | KSLFVLGDSNK | 0.000154027 | 2.1727 |
| Rhodospirillum rubrum | LPRLSPPR | 0.000812642 | 2.1437 |
| Hyphomonas neptunium | KGTLALK | 0.000191182 | 2.1307 |
| Oceanobacillus iheyensis | KAGDIIPK | 2.95E-05 | 2.1272 |
| Alcanivorax borkumensis | IPAPEGK | 0.000393838 | 2.1064 |
| Petrotoga mobilis | ISGVISQPK | 1.23E-07 | 2.093 |
| Neisseria meningitidis C | DPAKPGK | 8.31E-06 | 2.0923 |
| Schizosaccharomyces pombe | DLLEWTAPTK | 0.004699958 | 2.0706 |
| Leptospira interrogans | KNIPFAVTIAK | 2.65E-12 | 2.0314 |
| Chlorobaculum tepidum | NFCSSCSK | 0.000276808 | 2.0314 |
| Metamycoplasma hominis | KLATGSNCILLDVK | 0.008409941 | 1.937 |
| Lactobacillus gasseri | AFDALYDEDK | 0.000447865 | 1.9245 |
| Mycoplasmoides gallisepticum | VGFGIAK | 5.06E-06 | 1.9006 |
| Clostridium botulinum | VKSEVYR | 0.000227912 | 1.8808 |
| Streptomyces arenae | ADAAREIAR | 0.000124326 | 1.8807 |
| Streptomyces viridosporus | SRIPDYAK | 6.70E-06 | 1.8659 |
| Oryctolagus cuniculus | ASTLESGVPSR | 1.69E-05 | 1.8504 |
| Actinoplanes sp. | AVNLVGPDGR | 0.001180392 | 1.8446 |
| Escherichia coli O1:K1 | AGMAPIK | 7.60E-12 | 1.84 |
| Desmonostoc muscorum | SGSCSSCNGILK | 9.09E-05 | 1.8297 |
| Salmonella virchow | LIDYIRCHVSTIGGITPAK | 1.84E-05 | 1.8185 |
| Actinobacillus succinogenes | LVGAGPK | 4.53E-05 | 1.8046 |
| Tannerella forsythia | IVAICDIQKGPLEK | 0.002492393 | 1.7835 |
| Variovorax paradoxus | LNGLPANA | 0.000407879 | 1.7298 |
| Chlamydia pneumoniae | HDVGKLR | 8.29E-05 | 1.7284 |
| Mesorhizobium japonicum | FNGTPEGDWS | 0.003811998 | 1.7073 |
| Lachnoclostridium phytofermentans | GPTGVGR | 0.002412801 | 1.6985 |
| Listeria monocytogenes 4a | KYDLEVWIPSYNSYR | 0.015941173 | 1.6776 |
| Prochlorococcus marinus | ESQAGTGLR | 0.001307251 | 1.6533 |
| Pseudotsuga menziesii | ELLSEINR | 1.29E-11 | 1.6497 |
| Escherichia coli O139:H28 | TGAGMMDCKK | 0.014263042 | 1.6207 |
| Streptomyces fradiae | HGIPVPR | 0.000632678 | 1.6098 |
| Bacillus mycoides | LEVLSPLK | 0.000590212 | 1.5806 |
| Salmonella enteritidis | MTEIAQK | 0.000221659 | 1.5513 |
| Desulfovibrio desulfuricans | GISGKAK | 0.000746503 | 1.5082 |

**Supplementary Tabe 12: Metabolites bound to SAH Non-survivors HNA2**

| Compound | Label | Pval | FC |
| --- | --- | --- | --- |
| Eicosadienoic acid | HMDB0005060 | 5.40E-17 | 5.2976 |
| 11Z-Eicosenoic acid | C16526 | 2.16E-16 | 4.298 |
| Deoxycholic acid | C04483 | 2.37E-13 | 3.8733 |
| Phytosphingosine | C12144 | 7.40E-07 | 3.3465 |
| Acetyl-N-formyl-5-methoxykynurenamine | HMDB04259 | 2.73E-09 | 3.1762 |
| N-(6-aminohexanoyl)-6-aminohexanoic acid | C01255 | 2.90E-10 | 2.7423 |
| Niacinamide | C00153 | 2.32E-05 | 2.6708 |
| N-Stearoyl GABA | HMDB0062341 | 1.33E-05 | 2.4932 |
| Muramic acid | C06470 | 4.76E-07 | 2.3432 |
| Oxalosuccinic acid | HMDB03974 | 1.33E-06 | 2.2529 |
| Chenodeoxycholylarginine | HMDB0242396 | 2.74E-08 | 2.247 |
| Urea | HMDB0000294 | 3.07E-07 | 2.2106 |
| Phosphoroselenoic acid | HMDB06407 | 1.00E-08 | 2.0937 |
| 4-(2-Aminophenyl)-2,4-dioxobutanoic acid | C01252 | 0.000706 | 2.0699 |
| Protoporphyrinogen IX | C01079 | 6.21E-05 | 2.0563 |
| Octanal | HMDB01140 | 0.000633 | 2.0336 |
| 2-Hydroxyhexadecanoic acid | HMDB0031057 | 0.004469 | 2.023 |
| N-Docosahexaenoyl GABA | HMDB0062332 | 0.000325 | 1.9735 |
| Glycine | HMDB00123 | 1.81E-09 | 1.9394 |
| PG(16:1(9Z)/22:4(7Z,10Z,13Z,16Z)) | HMDB10596 | 7.97E-06 | 1.88 |
| Nicotinamide riboside | C03150 | 2.26E-09 | 1.8715 |
| Benzoylcarnitine | HMDB0240664 | 3.52E-05 | 1.8692 |
| 2'-Hydroxygenistein | HMDB34014 | 8.80E-09 | 1.8114 |
| gamma-Tocotrienol | HMDB12958 | 0.006276 | 1.7527 |
| Glutamylaspartic acid | HMDB28815 | 2.51E-06 | 1.7064 |
| Tetradecanoylcarnitine | HMDB0005066 | 0.00101 | 1.6927 |
| Vitamin K1 | HMDB15157 | 2.58E-05 | 1.6919 |
| N6,N6-Dimethyladenosine | C03416 | 0.006274 | 1.6794 |
| Glutamic acid | C00025 | 9.86E-07 | 1.6416 |
| Shikimic acid | C00493 | 8.76E-05 | 1.599 |
| 5-Hydroxykynurenamine | C05638 | 9.78E-05 | 1.5947 |
| Leukotriene C4 | C02166 | 5.96E-12 | 1.5871 |
| L-prolyl-L-leucine | HMDB0253028 | 0.002749 | 1.5835 |
| 2-Octenoylcarnitine | HMDB0013324 | 0.000233 | 1.5676 |
| Decanoylcarnitine | HMDB00651 | 0.00018 | 1.5199 |

**Supplementary Tabe 13: Proteins bound to SAH Non-survivors HNA2**

|  | Pval | FC |
| --- | --- | --- |
| SPPL2B | 1.80E-21 | 7.9982 |
| NTN5 | 7.68E-20 | 6.5225 |
| HOXC13 | 3.80E-17 | 6.0665 |
| GAL3ST1 | 4.75E-16 | 5.9574 |
| FGGY | 2.92E-19 | 5.9391 |
| FAM161A | 5.01E-18 | 5.4503 |
| MTFMT | 3.00E-13 | 5.3467 |
| PDE6C | 1.05E-18 | 5.2256 |
| TCF3 | 8.96E-13 | 5.214 |
| ELOB | 1.98E-14 | 5.0396 |
| PPIA | 1.22E-15 | 4.9835 |
| UTP4 | 8.10E-13 | 4.9679 |
| CDC42EP2 | 3.51E-16 | 4.743 |
| RUVBL2 | 1.30E-12 | 4.7194 |
| RAB3D | 5.03E-16 | 4.6693 |
| ZHX3 | 6.01E-16 | 4.5653 |
| ZNF260 | 7.23E-10 | 4.3194 |
| PRSS33 | 4.92E-12 | 4.1555 |
| ZNF101 | 2.38E-10 | 4.1043 |
| CC2D1A | 6.42E-15 | 4.0939 |
| GTDC1 | 4.25E-13 | 4.0939 |
| RD3L | 2.30E-14 | 4.0855 |
| RRP15 | 1.92E-13 | 4.0315 |
| PYROXD2 | 2.71E-13 | 3.9576 |
| METTL14 | 5.59E-11 | 3.9058 |
| UBE2R2 | 5.30E-09 | 3.859 |
| SPMIP4 | 1.81E-13 | 3.8582 |
| DNAJC14 | 5.47E-09 | 3.8413 |
| CCDC86 | 2.09E-08 | 3.7923 |
| ZNF672 | 1.44E-11 | 3.764 |
| DNAJC15 | 1.24E-14 | 3.7321 |
| FOXC1 | 1.66E-14 | 3.7064 |
| SIGLEC10 | 6.99E-10 | 3.6395 |
| MED30 | 1.62E-08 | 3.6244 |
| CLEC4D | 2.81E-12 | 3.5446 |
| BARD1 | 1.84E-10 | 3.5243 |
| PCDHGB7 | 3.34E-07 | 3.4972 |
| A2ML1 | 3.84E-10 | 3.491 |
| GIMAP1 | 5.62E-08 | 3.4774 |
| CBARP | 3.73E-13 | 3.465 |
| PRSS48 | 2.90E-07 | 3.4568 |
| CHRDL2 | 7.52E-10 | 3.4296 |
| MFSD10 | 1.61E-10 | 3.401 |
| CD248 | 2.03E-07 | 3.3952 |
| DISP2 | 1.11E-10 | 3.39 |
| CLUH | 5.20E-09 | 3.3841 |
| PTCHD1 | 5.24E-08 | 3.3676 |
| KLF1 | 2.42E-09 | 3.3603 |
| ZNF544 | 8.71E-10 | 3.321 |
| ARPC4 | 5.39E-07 | 3.3138 |
| TSSK3 | 4.72E-10 | 3.301 |
| SHISA5 | 1.56E-07 | 3.2319 |
| FTCDNL1 | 2.76E-11 | 3.1634 |
| ADAT3 | 7.77E-09 | 3.1561 |
| MLLT6 | 6.64E-10 | 3.122 |
| CDCA3 | 1.20E-09 | 3.1165 |
| DES | 1.65E-06 | 3.1116 |
| RTL8C | 7.95E-09 | 3.1101 |
| PDIK1L | 2.12E-06 | 3.1044 |
| DHX34 | 5.06E-10 | 3.014 |
| C1QA | 1.54E-08 | 3.0072 |
| PEX7 | 2.58E-06 | 3.0039 |
| DNAAF10 | 8.52E-10 | 2.9867 |
| MPDZ | 1.55E-08 | 2.9814 |
| ZNF784 | 3.33E-06 | 2.9602 |
| PLK3 | 4.71E-07 | 2.955 |
| ZNF474 | 4.80E-06 | 2.9346 |
| TRIM64B | 3.85E-07 | 2.9233 |
| TULP1 | 9.20E-09 | 2.9209 |
| POLR3C | 7.73E-06 | 2.908 |
| SPATA17 | 1.21E-06 | 2.9004 |
| CLRN2 | 9.37E-08 | 2.8827 |
| BRINP1 | 1.63E-06 | 2.8803 |
| KLF3 | 7.90E-07 | 2.8791 |
| KLHL32 | 1.50E-05 | 2.8749 |
| PA2G4 | 2.02E-10 | 2.8532 |
| HAPLN4 | 4.12E-09 | 2.8461 |
| FAM53A | 4.13E-09 | 2.8308 |
| SPSB3 | 7.85E-11 | 2.8302 |
| DOT1L | 4.22E-09 | 2.8245 |
| SCN4A | 3.91E-06 | 2.8226 |
| TRIL | 2.87E-08 | 2.7903 |
| LIPC | 5.91E-05 | 2.7039 |
| EDC3 | 5.29E-05 | 2.6925 |
| TRIM77 | 6.45E-08 | 2.6912 |
| TMEM190 | 2.96E-07 | 2.6765 |
| GALNT12 | 2.03E-07 | 2.662 |
| MMP10 | 2.28E-05 | 2.6544 |
| PIWIL4 | 3.87E-10 | 2.6407 |
| SEMA3G | 1.08E-05 | 2.6351 |
| FRZB | 6.19E-11 | 2.634 |
| ZFY | 2.85E-06 | 2.6218 |
| COX11 | 8.17E-05 | 2.6026 |
| ZNF564 | 3.01E-10 | 2.6007 |
| PLCXD3 | 2.33E-05 | 2.591 |
| SSR1 | 1.27E-08 | 2.5897 |
| PGK2 | 2.76E-07 | 2.5891 |

**Supplementary Figure 1:** Correlation map of Bio-molecules bound to SAH Non survivors HNA1


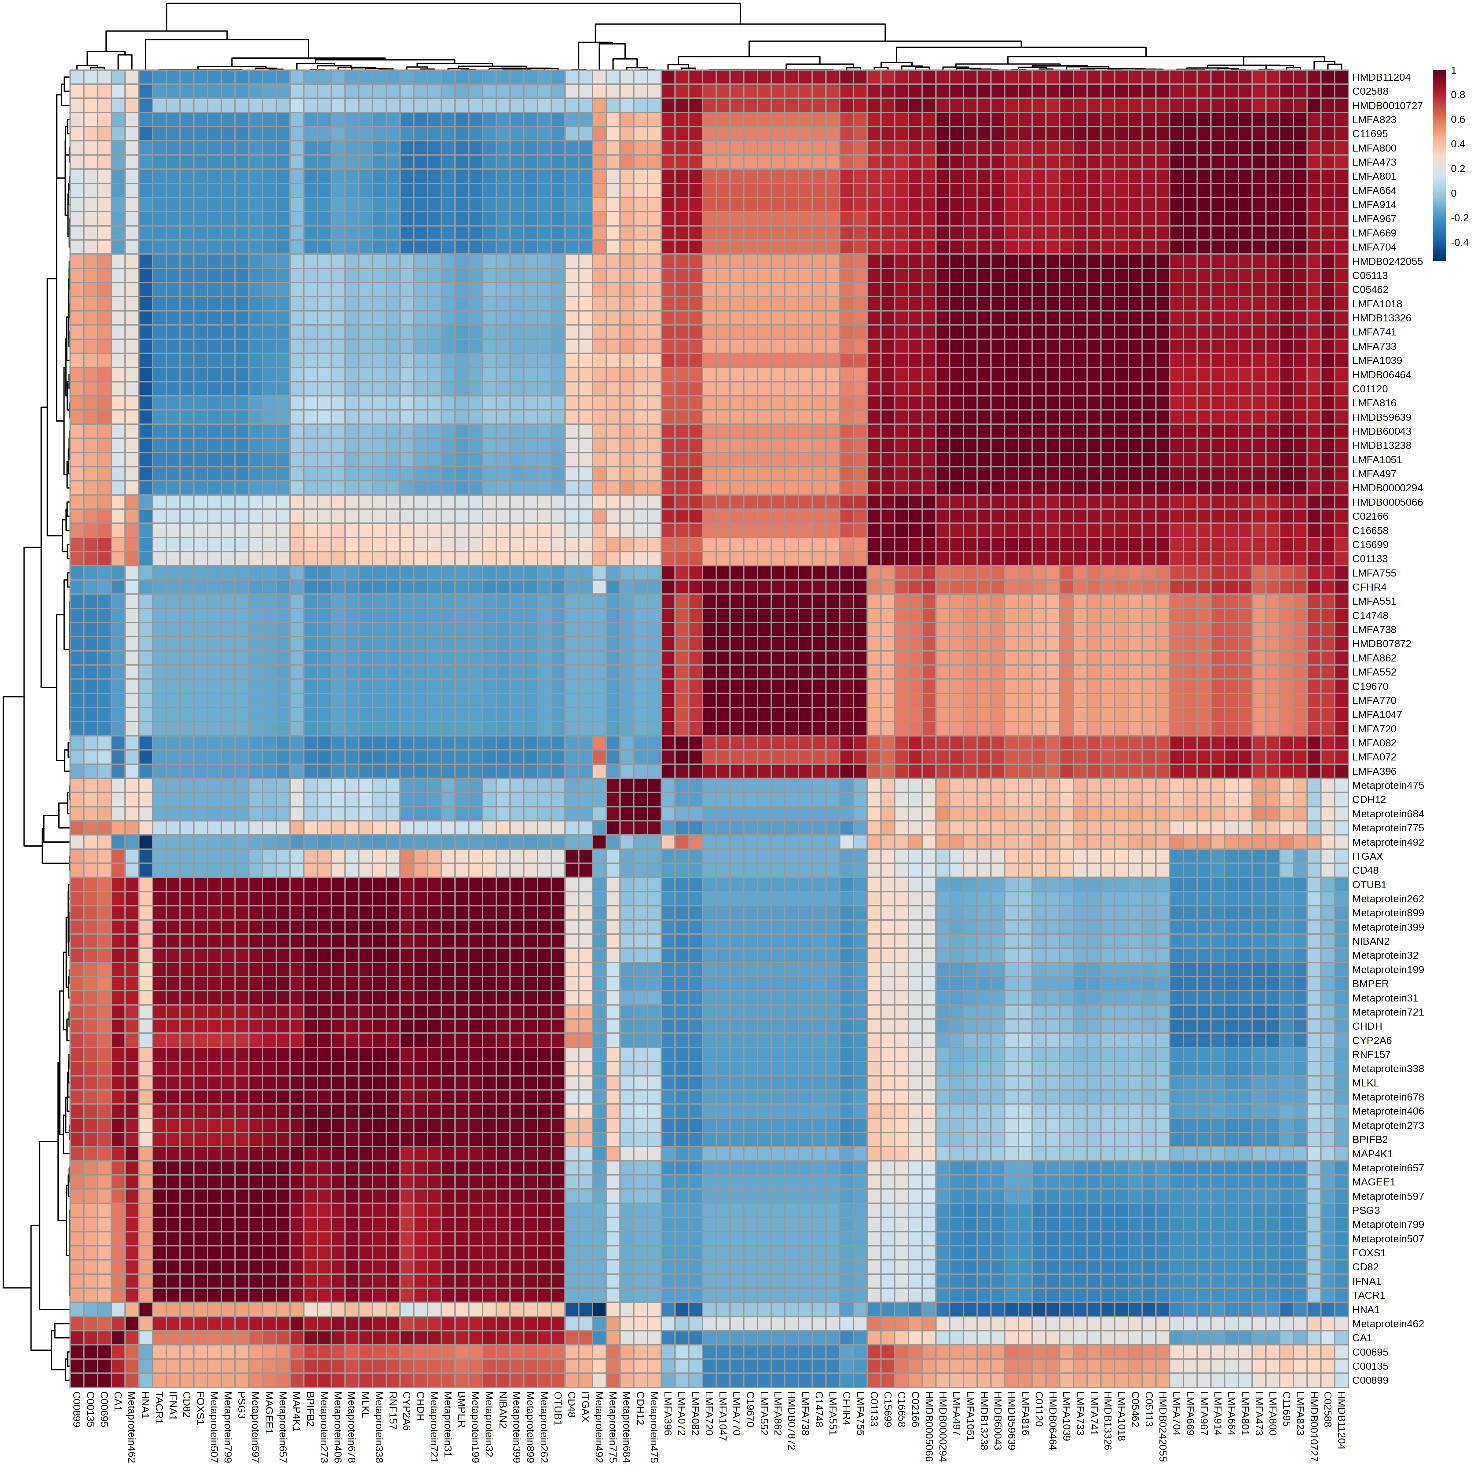


**Supplementary Figure 2:**  Correlation map of Bio-molecules bound to SAH Non survivors HNA2


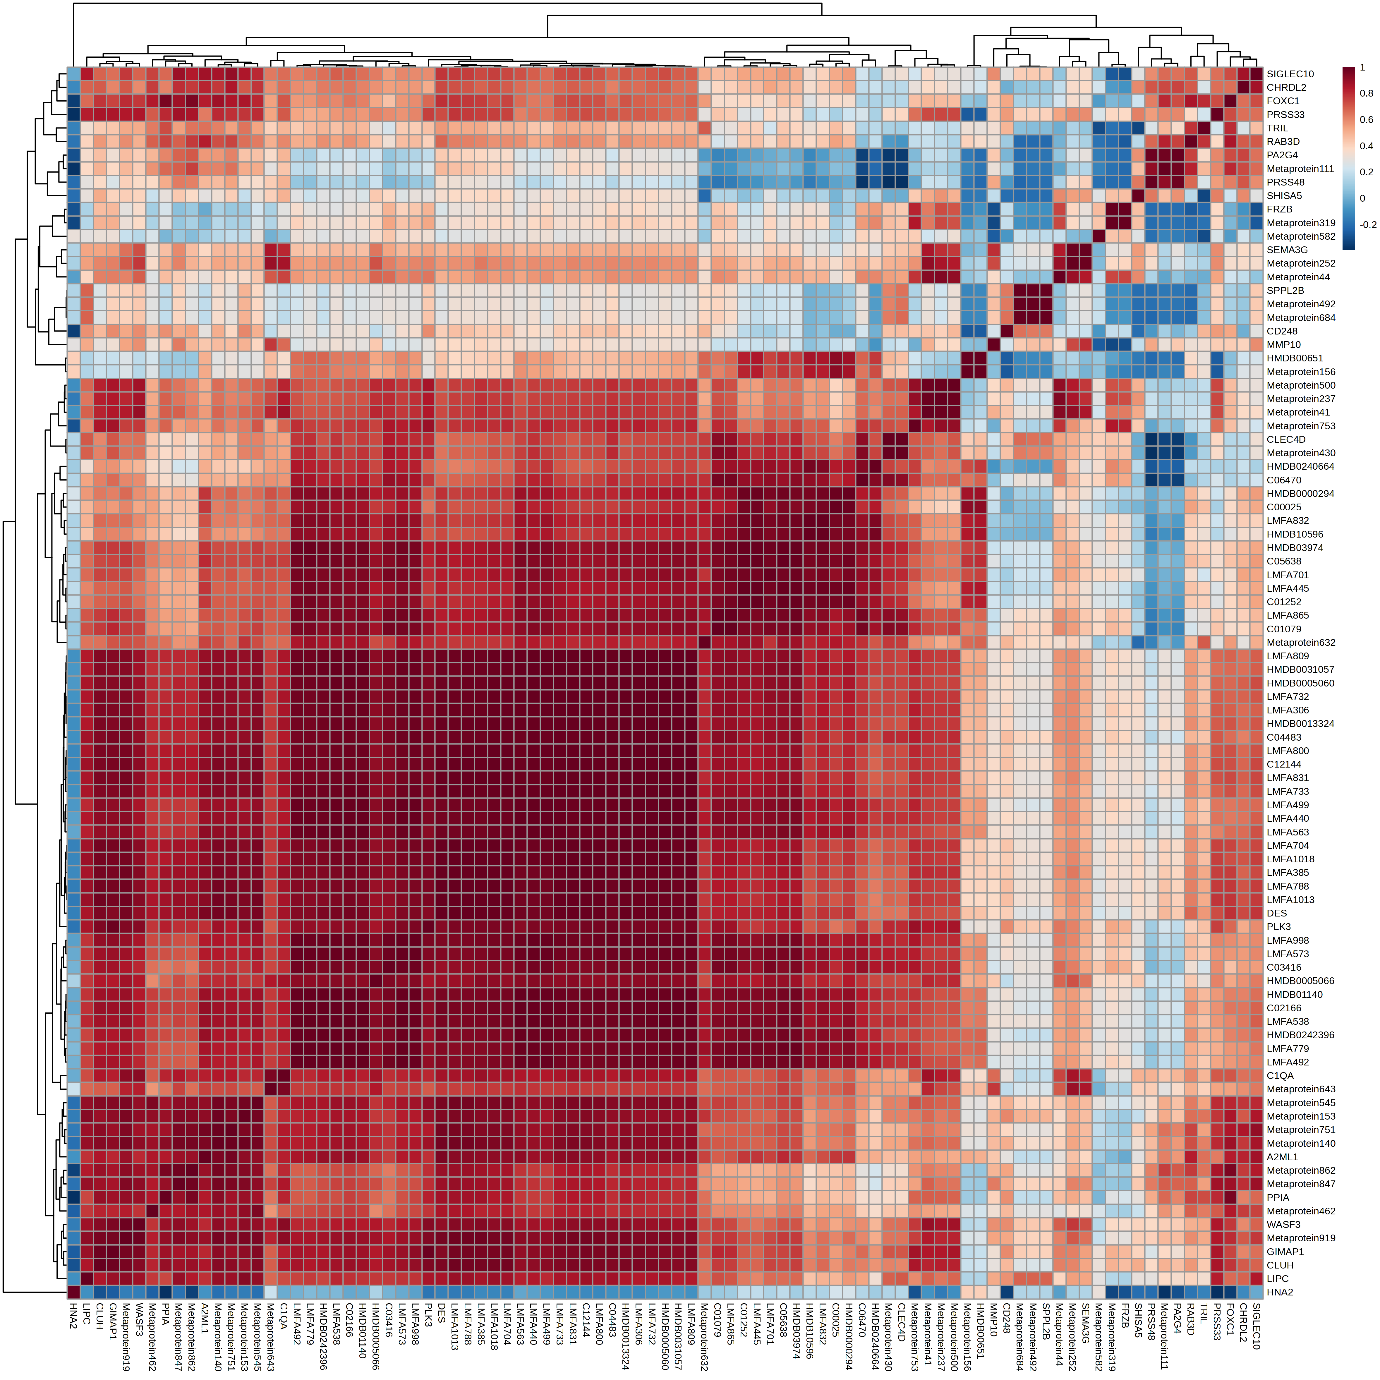


**Supplementary Figure 3:**  Hierarchical clustering map of proteins associated to Neutrophil activation, migration, oxidative burst and inflammation in healthy neutrophils treated with PMA, SAH-NS derived HNA2, SAH-NS derived HNA2+Cyclosporin A

**
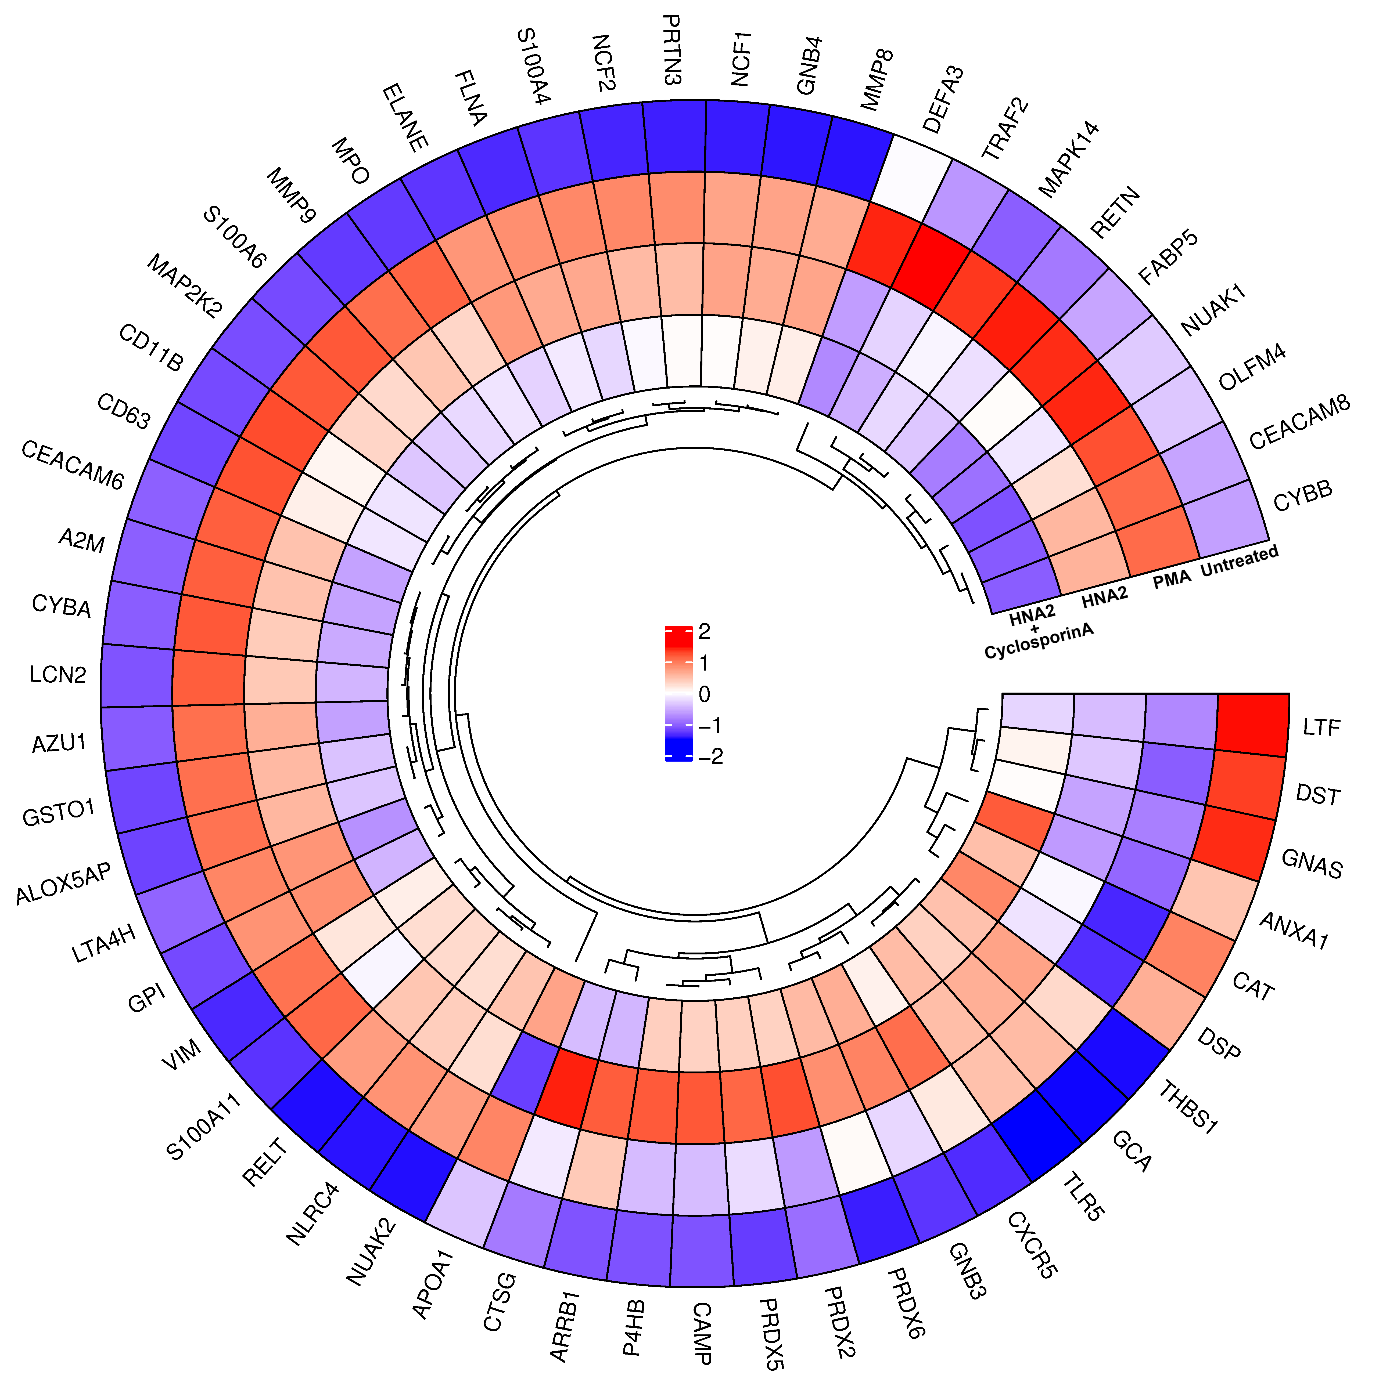
**
