# Supplementary material
Source: Research Square preprint supplement (doi:10.21203/rs.3.rs-9331155/v1)
Supplement: Supplementary file 3 [file 8db8a6c73b920a3526c06c51.docx]

**Proteomics and Metaproteomics**

*(a) Sample preparation for Proteomics and Meta-proteomics*

After separation of albumin redox fractions from all study groups, they were subjected to protein quantification using the Bradford assay.

*In-solution protein digestion*

- Fifty micrograms of protein equivalent were vacuum dried and reconstituted in 200 μl of ammonium bicarbonate (ABC) buffer.
- To reduce disulfide bonds, 20 μl of 10 mM dithiothreitol (DTT) was added, followed by incubation at 60 °C for 1 hour in a water bath.
- After reduction, 15 μl of 10 mM iodoacetamide (IAA) was added and incubated for 30 minutes in the dark to achieve protein alkylation.
- Protein digestion was performed by adding 10 μl of modified sequencing-grade trypsin (0.1 μg/μl) and incubating at 37 °C for 20–24 hours in a water bath. Trypsin activity was terminated by adding 5 μl of concentrated formic acid.

*C18 column-mediated desalting of peptides*

The digested albumin peptides were purified using Thermo Scientific Pierce C18 Spin Columns (Catalog no. 89873), following the manufacturer’s protocol:

- Place a new Pierce C18 spin column in a 1.5 ml Eppendorf tube.
- Condition with 200 μl of 100% acetonitrile (ACN) for 5 minutes.
- Centrifuge for 2 minutes and discard the flow-through.
- Activate with 200 μl of wash buffer (50% ACN + 50% water) for 5 minutes.
- Centrifuge for 2 minutes and discard the flow-through.
- Equilibrate with 200 μl of equilibration buffer for 2 minutes, then discard the flow-through.
- Load 50 μg of digested protein onto the column and incubate for 5 minutes.
- Collect the follow-through and reload onto the column, repeating four times to ensure peptide binding.
- Centrifuge for 2 minutes and discard the flow-through.
- Wash with 200 μl equilibration buffer (5% ACN + 95% water) for 2 minutes.
- Centrifuge for 2 minutes and discard the flow-through.
- Elute with 30 μl elution buffer (90% ACN + 10% water) for 2 minutes.
- Repeat with an additional 30 μl elution buffer.
- Finally, add 40 μl elution buffer and centrifuge for 2 minutes.
- Collect the eluate and discard the used column.
- Lyophilize samples at 4 °C under 60 mbar until dry (avoiding overdrying to maintain solubility).
- Reconstitute in 40 μl of 0.1% formic acid.
- Centrifuge at 15,000 g and transfer 20 μl of the supernatant into an HPLC vial.

*(b) Mass spectrometry analysis: Proteomics*

Peptides were ionised by nano-electrospray and analysed via tandem mass spectrometry (MS/MS) using a Q-Exactive™ Plus (Thermo Fisher Scientific, San Jose, CA, United States). Peptides were first enriched on a trap column (75 μm × 2 cm, 3 μm, 100 Å, nanoViper C18 Acclaim PepMap™ 100) at 8 μl/min, then resolved on an analytical column (75 μm × 25 cm, 2 μm, 100 Å, nanoViper C18 Acclaim PepMap™ RSLC). Elution was achieved with a 3–95% gradient of buffer B (80% ACN in 0.1% formic acid) at 800 nl/min over ~70 minutes.

Peptides were analysed in collision-induced dissociation mode with an electrospray voltage of 2.3 kV. Orbitrap full MS scans were acquired at 70,000 resolution, m/z 350–1800. MS/MS spectra were processed in Proteome Discoverer (v2.0, Thermo Fisher Scientific) against the UniProt Homo sapiens database (UP000005640) using Mascot 2.4 (Matrix Science). Significant proteins were identified at p < 0.05 and q < 0.05, with a false discovery rate (FDR) of 0.01. Identified proteins were further analysed for statistical significance, pathways, and networks.

*(c) Mass spectrometry analysis: Meta-proteomics*

Proteins isolated from plasma samples of the study groups were reduced, alkylated, digested with trypsin, and analyzed via mass spectrometry as described for proteomics. MS/MS data were analyzed in Proteome Discoverer (v2.0) against bacterial and fungal sequence databases (UniprotSwP_20170609, 467,231 sequences; MG_BG_UPSP, 2,019,194 sequences). Mascot 2.4 (Matrix Science) was used for cross-validation across microbial species. Significant peptide groups were identified at p < 0.05 and q < 0.05 with an FDR of 0.01. Only rank-1 peptides with peptide sequence matches (PSMs) >3 were included in biodiversity and functional analyses using Unipept. Peptides mapping to eukaryotic, fungal, or viral databases were excluded, and only bacterial species-associated peptides were subjected to statistical, functional, and biodiversity analyses as described previously.

**4.2.5 Lipidomics**

*(a) Sample preparation for Lipidomics*

Total lipids were extracted from 100 μl of redox albumin fractions using the Folch method.

- Add chloroform/methanol (2:1, v/v) and incubate at −20 °C for 24 hours.
- Centrifuge at 13,000 rpm for 10 minutes.
- Transfer the upper aqueous phase (containing lipid species) into a new tube. Discard the protein-rich interphase and pool the lower lipid-rich organic phase with the aqueous fraction. Vacuum dry
- Reconstitute dried samples in 100 μl of standard solution (65% acetonitrile: 30% isopropanol: 5% water: 5% standards).
- Pipette 80 μl into HPLC tubes.
- Pool 25 μl from each sample to create a quality control (QC) sample, analyzed in serial runs.

*Internal standards*: Dinoseb (1 mg/ml), MCPA (1 mg/ml), Dimetrazole (1 mg/ml).

*External standards:* Cholesterol (0.1 mg/ml), Colchicine (4 mg/ml), Imipramine (2 mg/ml), Roxithromycin (2 mg/ml), Amiloride (1 mg/ml), Atropine (2 mg/ml).

*(b) Mass spectrometry analysis: Lipidomics*

Fifteen microliters of sample were subjected to reverse-phase chromatography on a C18 column (Thermo Scientific, 3 μm, 2.1 mm × 100 mm) with tandem MS/MS. Mobile phase A: 0.1% formic acid; Mobile phase B: 100% acetonitrile.

Samples were analyzed on a Q-Exactive mass spectrometer (Thermo Scientific, San Jose, CA) under both positive and negative ionization modes. Spray voltage: +3.7 kV / −3.1 kV; capillary temperature: 360 °C; sheath/auxiliary gas flow: 15/10 (a.u.). MS/MS isolation width: m/z 1.5; normalized collision energy: 32%; resolution: 17,500 FWHM at m/z 200.

Lipid features were identified with LipidSearch 4.0 (Thermo), using the following parameters: product ion search, LC-MS mode, precursor tolerance 5–7 ppm, product tolerance 7–10 ppm, intensity threshold 1%, height-score threshold 8, quantitation on, m/z tolerance ±5 ppm, retention time ±0.5 min, rank filter enabled, main isomer peak filter, m-score ≥5, c-score ≥2, fatty acid priority enabled. Lipid classes were unrestricted. Positive adducts: +H, +NH₄, +2H. Negative adducts: −H, +HCOO, −2H.

**4.2.6 Metabolomics**

*(a) Sample preparation for metabolomics*

Metabolites were isolated from 100 μl redox albumin fractions using organic phase extraction. Samples were prepared at 4:1 (methanol:sample), incubated overnight at −20 °C.

- Centrifuge at 13,000 rpm for 10 minutes.
- Discard protein pellet; dry supernatant under vacuum.
- Reconstitute dried extracts in 100 μl of standard solution (90% water: 5% acetonitrile: 5% standards).
- Transfer 80 μl into HPLC tubes.
- Pool 25 μl from each sample for QC, analyzed in dilution series (1:1, 1:2, 1:4, 1:8) for reproducibility.

*Internal standards*: Dinoseb (1 mg/ml), MCPA (1 mg/ml), Dimetrazole (1 mg/ml).

*External standards:* Cholesterol (0.1 mg/ml), Colchicine (4 mg/ml), Imipramine (2 mg/ml), Roxithromycin (2 mg/ml), Amiloride (1 mg/ml), Atropine (2 mg/ml).

*(b) Mass spectrometry analysis: Metabolomics*

Fifteen microliters were analyzed via reverse-phase chromatography on a C18 column (Thermo Scientific, 3 μm, 2.1 mm × 100 mm) with UHPLC. Mobile phase A: 0.1% formic acid; Mobile phase B: 100% acetonitrile.

Samples were analyzed on a Q-Exactive mass spectrometer (Thermo Scientific, San Jose, CA). Conditions: spray voltage +3.7 kV / −3.1 kV, capillary temperature 360 °C, sheath/auxiliary gas 15/10 (a.u.).

Features were identified using Compound Discoverer 3.0 (Thermo Scientific USA), annotated against Mass List, ChemSpider, mzVault, Metabolika, and mzCloud. Data were , Pareto-scaled (MetaboAnalyst 5.0), and subjected to PCA, PLS-DA, heatmaps, and random forest analyses. Pathway enrichment was performed with MetaboAnalyst 5.0. Multivariate, correlation, and univariate regression analyses were performed using IBM SPSS v2.0.

*Correlation Network Analysis*

Correlation clustering of albumin-bound proteins, metaproteins, lipids, and metabolites was performed in MetaboAnalyst 5.0. Cytoscape-MetaScape 3.9.1 was used to generate correlation network maps, identifying four distinct clusters with bacterial- and protein-centric groupings. Additional correlation analyses incorporated clinical parameters, albumin functionality, mortality probability, and differentially expressed molecules in non-survivors using the R package.
